# 1 **In vitro reconstitution of divisome activation**

2 Philipp Radler<sup>1\*</sup>, Natalia Baranova<sup>1,2\*</sup>, Paulo Caldas<sup>3</sup>, Christoph Sommer<sup>1</sup>, Mar López-Pelegrín<sup>1</sup>,  
3 David Michalik<sup>1</sup>, Martin Loose<sup>1#</sup>

4 <sup>1</sup>Institute for Science and Technology Austria (IST Austria), Klosterneuburg, Austria

5 <sup>2</sup>University of Vienna, Department of Pharmaceutical Sciences, Vienna, Austria

6 <sup>3</sup>UCIBIO – Applied Molecular Biosciences Unit, Department of Life Sciences, NOVA School of  
7 Science and Technology, Universidade Nova de Lisboa, Caparica, Portugal

8

9 \* Contributed equally.

10 # Correspondence: [martin.loose@ist.ac.at](mailto:martin.loose@ist.ac.at)

## 11 **Abstract**

12 Bacterial cell division is coordinated by the Z-ring, a cytoskeletal structure of treadmilling  
13 filaments of FtsZ and their membrane anchors, FtsA and ZipA. For divisome maturation and  
14 initiation of constriction, the widely conserved actin-homolog FtsA plays a central role, as it links  
15 downstream cell division proteins in the membrane to the Z-ring in the cytoplasm. According to  
16 the current model, FtsA initiates cell constriction by switching from an inactive polymeric  
17 conformation to an active monomeric form, which then stabilizes the Z-ring and recruits  
18 downstream proteins such as FtsN. However, direct biochemical evidence for this mechanism is  
19 missing so far. Here, we used biochemical reconstitution experiments in combination with  
20 quantitative fluorescence microscopy to study the mechanism of divisome activation *in vitro*. By  
21 comparing the properties of wildtype FtsA and FtsA R286W, a gain-of-function mutant thought  
22 to mimic its active state, we found that active FtsA outperforms the wildtype protein in replicating  
23 FtsZ treadmilling dynamics, filament stabilization and FtsN recruitment. We could attribute these  
24 differences to a faster membrane exchange of FtsA R286W as well as its higher packing density  
25 below FtsZ filaments. Using FRET microscopy, we also show that binding of FtsN does not  
26 compete with, but promotes FtsA self-interaction. Together, our findings shed new light on the  
27 assembly and activation of the bacterial cell division machinery and the mechanism of how FtsA  
28 initiates cell constriction.

29

## 30 **Keywords:**

31 Bacterial cell division, *in vitro* reconstitution, FtsZ, FtsN, FtsA

32

## 33 **Introduction**

34 Bacteria have intricate intracellular organizations, where different proteins localize to distinct  
35 sites in a tightly regulated, highly dynamic manner. The molecular mechanisms that give rise to  
36 these complex spatiotemporal dynamics are often unknown. This is in particular true for the  
37 divisome, a highly complex protein machinery that accomplishes cell division with remarkable  
38 precision<sup>1</sup>. The divisome consists of more than a dozen different proteins that assemble in a step-  
39 like manner. Divisome assembly is initiated by the simultaneous accumulation of FtsZ, FtsA and  
40 ZipA at midcell, where they organize into the Z-ring, a composite cytoskeletal structure of  
41 treadmilling filaments at the inner face of the cytoplasmic membrane (**Fig. 1a**). In a second step,  
42 this dynamic Z-ring recruits cell division proteins to the division plane and promotes their  
43 homogeneous distribution around the circumference of the cell<sup>2</sup>. Finally, the cell starts to  
44 constrict while generating two new cell poles splitting the dividing cell in two. Although the  
45 biochemical network underlying cell division is now well studied<sup>3</sup>, how the membrane anchors

46 of FtsZ control the timing of recruitment and activation of cell division proteins located in the cell  
47 membrane is currently unknown<sup>4-6</sup>.

48 The actin-homolog FtsA is widely conserved and generally considered to be the more  
49 important membrane linker for FtsZ filaments<sup>7,8</sup>. It can reversibly bind to the membrane via a C-  
50 terminal amphipathic helix, where it recruits FtsZ filaments by binding to their C-terminal  
51 peptides (**Fig. 1b**). FtsA was found to self-interact to oligomerize into actin-like single or double  
52 protofilaments<sup>9</sup> as well as membrane-bound minirings composed of 12 FtsA monomers with a  
53 diameter of about 150 nm<sup>10</sup>. In addition, FtsA binds to many other proteins of the divisome,  
54 including FtsN, FtsQ, FtsX and FtsW<sup>4,6,11-15</sup> highlighting its indispensable role for cell division.  
55 While FtsA is essential in *E. coli*, several FtsA mutants have been identified that can compensate  
56 for the loss of other essential cell division proteins, including the alternative membrane anchor  
57 ZipA, but also FtsEX, FtsN, FtsQ and FtsK<sup>7,16,17</sup>. *In vivo*, these mutants facilitate the recruitment of  
58 division proteins and stabilize the Z-ring, which can lead to premature division<sup>5,8,16-18</sup>.  
59 Importantly, these properties correlate with a reduced self-interaction in yeast two-hybrid assays  
60 as well as the absence of cytoplasmic rods when membrane-binding deficient proteins are  
61 overexpressed<sup>17</sup>. As suppressor mutations are located at or near the binding interface between  
62 two FtsA subunits, these observations led to a model, where FtsA oligomerization and  
63 recruitment of downstream proteins are mutually exclusive and where divisome maturation and  
64 cell constriction depends on the switch of FtsA from an inactive, polymeric state to the active,  
65 monomeric form<sup>3,14,17</sup> (**Fig. 1b**). While this model is consistent with many observations made *in*  
66 *vivo*, direct biochemical evidence for FtsA's different activity states, their molecular properties  
67 and the mechanism of their conversion remains missing so far.

68 Here, we have reconstituted the dynamic interactions between treadmilling filaments of FtsZ,  
69 its membrane-anchor FtsA and the cytoplasmic peptide of the late division protein FtsN on  
70 membrane surfaces *in vitro*. By comparing the properties of wildtype FtsA and FtsA R286W, a  
71 hyperactive mutant that represents the activated state of the protein, we provide answers to two  
72 fundamental questions about the role of FtsA for divisome maturation and initiation of cell  
73 constriction: first, what is the relationship between the activity state of FtsA, its self-interaction  
74 and the recruitment of downstream proteins? And second, how does activation of FtsA affect the  
75 spatiotemporal organization of itself and that of FtsZ filaments on the membrane? By answering  
76 these questions, we shed light on the mechanism of bacterial cell division and also identify  
77 general requirements we believe to be important for the propagation of biochemical signals in  
78 living cells.

79

## 80 **Results:**

### 81 **Membrane patterning of FtsA by treadmilling filaments of FtsZ**

82 FtsA localization to the division septum during the cell cycle is known to be FtsZ-dependent<sup>19</sup>.  
83 FtsZ also determines the circumferential dynamics of FtsA during treadmilling<sup>20</sup>. To study how  
84 FtsZ filaments direct binding of FtsA to the membrane on these two different time scales, we used  
85 a previously established *in vitro* reconstitution assay<sup>4,21</sup> based on dual-colour TIRF imaging of  
86 proteins binding to a glass supported lipid bilayer. Using this approach, we were able to  
87 simultaneously record the dynamics of fluorescently labelled FtsZ and FtsA on the membrane  
88 surface at high spatiotemporal resolution.

89 When we added fluorescently labelled FtsZ and FtsA to the supported membrane at a  
90 concentration ratio similar to the one found *in vivo*<sup>22</sup> (5:1) and lower (i.e. FtsZ = 1.25  $\mu$ M and FtsA  
91 = 0.2  $\mu$ M or 0.1  $\mu$ M, with 75% A488-FtsZ and 66% Cy5-FtsA) the proteins immediately formed a  
92 dynamic cytoskeleton pattern of treadmilling filaments where both proteins closely overlapped  
93 (**Fig. 1c**). We quantified the colocalization of the two fluorescent signals at steady state (after  
94 about 15 min incubation), where we obtained a high Pearson correlation coefficient (PCC) of  $0.78$   
95  $\pm 0.04$  (s.d. = standard deviation) and  $0.69 \pm 0.06$  for 0.1  $\mu$ M and 0.2  $\mu$ M FtsA respectively (**Fig.**  
96 **1e**). We were then wondering how this colocalization would be affected at higher FtsA  
97 concentrations. If its localization on the membrane was strictly FtsZ-dependent, we should  
98 observe strong colocalization of the two proteins, while excess protein would remain in solution.  
99 When we increased the bulk concentration of FtsA to 0.4 and 0.8  $\mu$ M, we instead found that FtsA  
100 pattern abruptly changed to cover the membrane homogeneously, while the FtsZ pattern  
101 remained unchanged. Concurrently, the corresponding colocalization coefficient dropped to PCC  
102 values of  $0.32 \pm 0.12$  and  $0.27 \pm 0.09$  respectively (**Fig. 1c, 1e**). This observation suggests that at  
103 high concentrations, FtsA binds to the membrane independently of FtsZ filaments. Within this  
104 range of FtsA concentrations, we could not observe a significant change in FtsZ treadmilling  
105 velocity or monomer residence time (**Fig. S1a, S1b**). Also the corresponding filament  
106 reorganization dynamics as quantified by the decay of the temporal autocorrelation function  
107 stayed constant<sup>23</sup> (**Fig 1i, S1e**), indicating that in this range of concentrations FtsA does not yet  
108 destabilize FtsZ bundles as found previously<sup>21,24</sup>.

109 Next, we wanted to quantify FtsA-FtsZ co-treadmilling dynamics, i.e. how efficiently FtsZ  
110 and FtsA recruit each other to the membrane during filament growth. For this aim, we prepared  
111 differential time lapse movies<sup>25</sup>, where we subtract the intensities of consecutive frames to  
112 selectively visualize the growing ends of filament bundles (**Fig. 1d**). We then calculated the  
113 Pearson correlation coefficient between the two channels of the differential movies ( $PCC_{diff}$ ),  
114 which quantifies the covariation of the fluorescence signals for FtsA and FtsZ at the growing end  
115 of a filament bundle with a time resolution of the acquisition rate<sup>4,23,25</sup>. Like the colocalization  
116 coefficient (PCC), we found  $PCC_{diff}$  to rapidly drop with increasing FtsA:FtsZ ratio, indicating that  
117 the ability of FtsZ to dynamically pattern FtsA assemblies on the membrane is severely

118 compromised at high bulk concentrations of FtsA (**Fig. 1d, 1f**). *In vivo*, this property could  
119 contribute to the toxicity of FtsA observed at high expression levels as downstream cell division  
120 proteins would bind to FtsA independent of the Z-ring<sup>18,26–28</sup>.

121 To understand how the activity state of FtsA affects colocalization with FtsZ filaments, we  
122 repeated these experiments with FtsA R286W, a well-known ZipA suppressor mutant with  
123 decreased self-interaction that is considered to represent an active form of the protein<sup>17</sup>. In  
124 contrast to the wild-type protein, we found that this mutant showed more robust colocalization  
125 with FtsZ, with high PCC values of around 0.8 at all concentration tested (**Fig. 1e, g**). We also  
126 found FtsA R286W to co-migrate more efficiently with FtsZ filaments with constantly high PCC<sub>diff</sub>  
127 values (**Fig. 1f, h**). At the same time, we could not detect a difference in FtsZ treadmilling velocity,  
128 but slightly decreased turnover and increased fluorescence intensity for FtsZ compared to the  
129 wildtype protein (**Fig. S1a-d**). We also found the temporal autocorrelation function decayed  
130 more slowly for the filament pattern with FtsA R286W (**Fig. 1i, Fig S1e**), suggesting that this  
131 mutant restricts filament reorganization. Together, these results corroborate earlier *in vivo*  
132 observations that FtsA R286W stabilizes the Z-ring<sup>16</sup> and demonstrate that active FtsA  
133 outperforms wildtype FtsA in reproducing the spatiotemporal dynamics of treadmilling FtsZ  
134 filaments.

135 We found that wildtype FtsA and FtsA R286W strongly differ in their ability to localize to  
136 the FtsZ filament pattern (**Fig. 1c, g**). FtsZ interacts with FtsA via a highly conserved C-terminal  
137 peptide (CTP)<sup>29</sup>, whose binding site on FtsA is located in its 2B subdomain, close to the Arginine  
138 residue mutated in FtsA R286W<sup>9</sup>. Notably, previous yeast two-hybrid experiments suggested  
139 that FtsA R286W has an increased affinity towards FtsZ than the wildtype protein<sup>11,17</sup>. To test, if  
140 this possibility could explain the better colocalization of FtsA R286W with FtsZ filaments, we  
141 measured the binding time of a fluorescently labelled C-terminal FtsZ peptide (TAMRA-  
142 KEPDYLDIPAF LRKQAD=TAMRA-CTP) with His-tagged versions of FtsA (FtsA-His and FtsA  
143 R286W-His, also see Fig. 4) permanently attached to membranes containing dioctadecylamine  
144 (DODA)-tris-NTA, a Ni<sup>2+</sup>-chelating lipid (**Fig. S1f**). For both versions of FtsA, we found only very  
145 transient recruitment of the membrane-bound peptide, with a mean life time of only 90 ± 23ms  
146 for FtsA WT and 74 ± 6ms for FtsA R286W (p-value 0.40) (**Fig. 1j, S1g**). A higher affinity of FtsA  
147 R286W towards FtsZ monomers seems therefore unlikely to be the reason for its increased  
148 colocalization with FtsZ filaments.

149 Another explanation for the loss of colocalization could be a higher membrane affinity of  
150 FtsA WT that results in indiscriminate membrane binding independent of FtsZ. In contrast, an  
151 active, monomeric FtsA with low membrane affinity would only be recruited to the membrane in  
152 a high avidity complex with FtsZ filaments and predominantly detach from the membrane if not  
153 bound to FtsZ. To quantify the intrinsic membrane-affinity of the two versions of FtsA, we used

154 Quartz Crystal Microbalance with Dissipation (QCM-D) and measured the hydrated mass of  
155 adsorbed protein on a membrane surface. We found that the membrane affinity of FtsA R286W  
156 was only slightly lower than that of FtsA WT ( $K_d$   $0.32 \pm 0.05 \mu\text{M}$  and of  $0.21 \pm 0.01 \mu\text{M}$   
157 respectively) and that the amount of membrane-bound protein saturated at  $0.8 \mu\text{M}$  for both  
158 proteins (**Fig. 1k & S1h**). This result is consistent with the observation that FtsA WT and FtsA  
159 R286W behave identical in co-sedimentation experiments<sup>10</sup>. This small difference in membrane  
160 binding affinities to the membrane cannot explain the observed contrast in colocalization of the  
161 two version of FtsA with FtsZ filaments in particular at high bulk concentrations of the proteins.

162 Wildtype FtsA has the tendency to form membrane-bound arrays of minirings, while FtsA  
163 R286W was found to assemble into tightly packed short filaments and arcs<sup>10</sup>. Accordingly,  
164 enhanced colocalization with FtsZ could be because of a higher packing density of FtsA R286W  
165 below FtsZ filaments. To test this hypothesis, we analysed the pixel-by-pixel relationship between  
166 the fluorescence intensities of FtsZ and FtsA in dual-colour fluorescence time lapse movies. The  
167 linear slope of this relationship shows how the density of FtsA on the membrane changes when  
168 the FtsZ filament density increases and therefore is an indicator for the binding capacity of FtsZ  
169 filaments for FtsA (**Fig. S1i**). At low FtsA concentrations, we found the slopes for both proteins to  
170 be similar. Above  $0.2 \mu\text{M}$  these values dropped significantly for FtsA WT, but remained constant  
171 for FtsA R286W at  $\sim 0.7$  (**Fig. 1l, S1i**). These results indicate that at high concentrations the  
172 amount of FtsA WT that can be recruited to FtsZ filaments is strictly limited, likely due to the  
173 formation of minirings, while FtsA R286W continues to accumulate.

174

### 175 **FtsA R286W allows for enhanced recruitment of FtsN<sub>cyto</sub> to FtsZ filaments**

176 FtsA provides a physical link between treadmilling FtsZ filaments in the cytoplasm and cell  
177 division proteins located in the membrane. However, polymerization of FtsA and recruitment of  
178 downstream proteins are thought to be mutually exclusive as they both involve interactions via  
179 FtsA's 1C domain<sup>30</sup>. Accordingly, in an active, depolymerized FtsA this domain would be readily  
180 available to interact with downstream proteins like FtsN. Vice versa, binding of these proteins  
181 should facilitate the transition of FtsA from the inactive, oligomeric to the active, more  
182 monomeric form.

183 To test these predictions, we mimicked the presence of transmembrane FtsN in the  
184 bilayer by attaching its His-tagged, cytoplasmic peptide (FtsN<sup>1-32</sup>-His<sub>6x</sub>=FtsN<sub>cyto</sub>) to the surface of  
185 a supported membrane containing 0.25% Tris-NTA lipids<sup>4</sup>. We then used these modified  
186 membranes to compare how the two versions of FtsA differ in their ability to recruit FtsN<sub>cyto</sub> to  
187 treadmilling filaments of FtsZ (**Fig. 2a**). Closely mirroring the behaviour observed for the  
188 localizations of FtsA (**Fig. S2a, b**), we found strong overlap (PCC) and co-treadmilling (PCC<sub>diff</sub>) of  
189 FtsN<sub>cyto</sub> with FtsZ filaments at low concentrations of FtsA WT ([FtsA WT] <  $0.4 \mu\text{M}$ ) and a sudden

190 drop of these values at higher concentrations (**Fig. 2b-d**). In contrast, in the case of FtsA R286W,  
191 both values remained higher than 0.6, even at concentrations above 0.4  $\mu\text{M}$  (**Fig. 2c-e**).

192 Next, we were wondering about the rate of FtsN<sub>cyto</sub> accumulation on FtsZ-FtsA co-  
193 filaments. Starting from a homogeneous distribution of the membrane-bound peptide, we  
194 measured how quickly the overlap of the FtsN<sub>cyto</sub> and FtsZ signals increased after adding FtsA and  
195 FtsZ (**Fig. 2f, S2c,d**). By fitting an exponential function to the increase of the PCC with time, we  
196 were able to extract the corresponding recruitment rate (**Fig. 2f,g**). While FtsN enrichment  
197 saturated within 1 min for all concentrations of FtsA R286W, the recruitment rate for FtsA wt  
198 dropped significantly already at 0.2  $\mu\text{M}$  FtsA such that it required more than twice as long for  
199 FtsN to colocalize with FtsZ. Together, these data demonstrate FtsA R286W recruits downstream  
200 proteins to FtsZ filaments more efficiently than wildtype FtsA. This property could also explain  
201 why cell division is faster in cells with FtsA R286W<sup>31</sup>.

202 Previous literature suggested that arrival of FtsN at the Z-ring triggers disassembly of  
203 FtsA WT oligomers into a more FtsA R286W-like, monomeric state<sup>7</sup>. Thus, we were wondering if  
204 the presence of FtsN<sub>cyto</sub> could change the colocalization of FtsA WT with FtsZ to resemble the  
205 behaviour of FtsA R286W. While addition of FtsN<sub>cyto</sub> slightly increases the total amount of both  
206 proteins on the membrane, their overlap and the density of FtsA on FtsZ filaments, it could not  
207 prevent the loss of colocalization with FtsZ at higher concentrations of FtsA (**Fig. S2e-h**),  
208 indicating that the presence of FtsN<sub>cyto</sub> has no strong effect on the recruitment of FtsA towards  
209 FtsZ filaments. Interestingly, we found that adding FtsN<sub>cyto</sub> significantly slows down the  
210 reorganization dynamics of the FtsZ pattern, suggesting that binding of FtsN<sub>cyto</sub> leads to a  
211 transition in FtsA that prevents FtsZ filament realignment (**Fig. 2h, S2i**). However, FtsN<sub>cyto</sub> alone  
212 is not sufficient to fully convert FtsA WT into FtsA R286W.

213 Next, we wanted to know if the increased overlap between FtsN<sub>cyto</sub> and FtsZ with FtsA  
214 R286W can be explained by an increased affinity of FtsN towards the hypermorphic mutant as  
215 suggested previously<sup>5,17</sup>. To test this idea, we performed microscale thermophoresis experiments  
216 (MST) with fluorescently labelled FtsA WT and FtsA R286W and increasing concentrations of  
217 FtsN<sub>cyto</sub> (**Fig. 2i and S2j**). For both proteins, we measured similar dissociation constants in these  
218 experiments of  $K_D(\text{wt Cy5-FtsA}/\text{FtsN}_{\text{cyto}}) = 1.58 \pm 0.43 \mu\text{M}$  and  $K_D(\text{Cy5-FtsA R286W}/\text{FtsN}_{\text{cyto}}) =$   
219  $1.17 \pm 0.37 \mu\text{M}$ . Since FtsN interacts with FtsA on the membrane surface, we were wondering if  
220 two-dimensional confinement could enhance a difference. We therefore imaged the trajectories  
221 of individual membrane-bound FtsN<sub>cyto</sub> peptides in the presence of treadmill FtsZ-FtsA  
222 filaments and then quantified the duration and frequency of confinement<sup>4</sup> (**Fig. 2j, S2k, l**). We  
223 found that both values were in fact slightly lower for FtsA R286W confirming that it does not have  
224 increased affinity towards FtsN<sub>cyto</sub>.

225 We conclude that our *in vitro* experiments recapitulate several observations made in the  
226 living cell, where FtsA R286W recruit FtsN to FtsZ filaments more efficiently and its arrival at  
227 midcell stabilizes the Z-ring. However, we found this difference is not due to an enhanced affinity  
228 of this peptide to FtsA R286W, but likely the result of the higher packing density of FtsA R286W  
229 below FtsZ filaments (**Fig. 1l**).

230

231 **FtsA R286W shows faster membrane exchange than FtsA WT, while the self-interaction of**  
232 **both proteins is enhanced in the presence of FtsN<sub>cyto</sub>.**

233 So far, we have seen that FtsA R286W is more strongly recruited to FtsZ filaments (**Fig. 1**), which  
234 allows for an improved recruitment of FtsN<sub>cyto</sub> towards FtsA-FtsZ co-filaments (**Fig. 2**).  
235 Additionally, we also found that FtsA R286W co-migrates with treadmilling FtsZ filaments more  
236 efficiently (**Fig. 1d, f, h**). As FtsA WT and FtsA R286W do not significantly differ in their affinities  
237 towards FtsZ (**Fig. 1j**), the membrane (**Fig. 1k**) or FtsN<sub>cyto</sub> (**Fig. 2i, j**), we decided to investigate a  
238 possible mechanism that could explain our observations.

239 First, we studied the behaviour of single FtsA proteins on the membrane surface. In a  
240 background of unlabelled proteins, we followed individual FtsA WT and FtsA R286W proteins  
241 and analyzed their trajectories by single particle tracking (**Fig. 3a**). At 0.1 μM, we found that FtsA  
242 WT showed a low mobility with a diffusion constant of  $0.14 \pm 0.04 \mu\text{m}^2/\text{s}$  and a mean residence  
243 time of  $10.2 \pm 0.7$  s. With increasing bulk concentrations and protein densities on the membrane,  
244 the mean residence time remained constant ( $9.39 \pm 0.28$  s at 0.8 μM FtsA), while the diffusion  
245 constant dropped to a value of  $0.004 \pm 0.001 \mu\text{m}^2/\text{s}$  indicating almost immobile proteins on the  
246 membrane. Similar to previous FRAP experiments *in vivo*<sup>16</sup>, we found a faster exchange of FtsA  
247 R286W with a single molecule residence time 2-10 fold shorter than that of wildtype FtsA (from  
248  $0.54 \pm 0.14$  s to  $4.8 \pm 0.48$  s for 0.1 and 0.8 μM respectively). The diffusivity of FtsA R286W also  
249 decreased at higher protein concentrations (from  $0.42 \pm 0.06 \mu\text{m}^2/\text{s}$  to  $0.054 \pm 0.011 \mu\text{m}^2/\text{s}$  for  
250 0.1 and 0.8 μM respectively), but remained mobile even at higher concentrations (**Fig. 3b**). These  
251 differences in residence time and diffusion likely correlate with different modes of self-  
252 interaction of the two proteins<sup>10,17</sup>.

253 To directly measure FtsA self-interaction in our fluorescence microscopy experiments,  
254 we established a FRET (Foerster resonance energy transfer)-based assay using FtsA labelled with  
255 either Cy5 or Cy3. First, we tried to find evidence for self-interaction in solution, but could not  
256 detect any significant FRET signal under these conditions or oligomerization in SEC-MALS  
257 experiments (**Fig. S3a, S3b**) demonstrating that FtsA is monomeric in solution. However, we  
258 found that FRET increased significantly in the presence of lipid vesicles, indicating that  
259 oligomerization of FtsA depends on the interaction with lipid membrane (**Fig. S3b-S3c**). We then  
260 decided to use this approach to measure the degree of FtsA self-interaction on supported lipid



261 membranes by quantifying the change in donor fluorescence after photobleaching the acceptor  
262 fluorophore<sup>32-34</sup> (**Fig. 3c-e and Fig. S3d**). As a negative control, we attached His-SUMO labeled  
263 with these fluorophores to membranes with an increasing fraction of Tris-NTA lipids. For this  
264 negative control, we did not find any significant FRET, even at maximal coverage of the membrane  
265 surface (**Fig. 4g**). We also saw no change in donor intensity in photobleaching experiments  
266 without acceptor fluorophore. (**Fig. S3e**).

267 We found that the FRET efficiency for FtsA WT was generally higher than for R286W (**Fig.**  
268 **3c-3h**), and that it increased with the bulk concentration indicative for stronger FtsA WT self-  
269 interaction. We could also use the data from these bleaching experiments to quantify the  
270 membrane binding kinetics and diffusion of membrane-bound proteins by analysing the change  
271 of the fluorescence profile during recovery<sup>35</sup>. In agreement with our single molecule experiments,  
272 we found a much faster exchange (**Fig. 3i**) and diffusion for FtsA R286W compared to the  
273 wildtype protein (**Fig. 3j**). This fast turnover of FtsA R286W on the membrane can also explain  
274 the shorter confinement time we found for FtsN<sub>cyto</sub> (**Fig. 2j**). Consistent with our QCM-D  
275 experiments (**Fig. 1k**), we found that FRET and membrane exchange plateaued at FtsA  
276 concentrations above 0.8  $\mu\text{M}$  (**Fig. S3f-S3h**). Furthermore, we found that replacing ATP with a  
277 non-hydrolysable analogue ATP $\gamma$ S had no significant effect on membrane-binding, self-  
278 interaction or membrane binding dynamics (**Fig. S3i-S3k**). Together, these data confirm that self-  
279 interaction of membrane-bound FtsA WT is enhanced, which results in slower exchange  
280 dynamics compared to the mutant protein.

281 Next, we wanted to find out how binding of FtsZ and FtsN<sub>cyto</sub> affect FtsA protein exchange,  
282 diffusion and self-interaction on the membrane. In the presence of FtsZ, FtsA R286W is still  
283 exchanged one order of magnitude faster than the wildtype protein, with membrane off-rates of  
284 around 0.20 s<sup>-1</sup> and 0.05 s<sup>-1</sup> respectively (**Fig. 3i**). As the off-rates for FtsZ are between 0.10 and  
285 0.20 s<sup>-1</sup> (**Fig. S1b,c**), this means that FtsA R286W turns over 1-2 times faster than FtsZ monomers  
286 in the treadmilling filament, while FtsA WT remains bound about 2-4 times longer. For both  
287 versions of FtsA, the diffusion coefficient was decreased in the presence of FtsZ (**Fig. 3j**). Next, we  
288 were interested in testing if FtsN<sub>cyto</sub> promotes de-oligomerization of FtsA WT and reduces the  
289 corresponding FRET efficiency<sup>7</sup>. Surprisingly, we found that for FtsA WT the presence of FtsN<sub>cyto</sub>  
290 resulted in a small FRET increase. In the case of FtsA R286W we found a reduced, albeit present  
291 FRET signal, which was further increased three-fold when both binding partners, FtsN<sub>cyto</sub> and  
292 FtsZ were present. In addition, we found that the presence of FtsN<sub>cyto</sub> slightly decreased the  
293 detachment rate and membrane mobility of both FtsA WT and FtsA R286W (**Fig. 3i-j**). Together,  
294 these observations show that in contrast to previous reports, FtsN<sub>cyto</sub> does not trigger  
295 disassembly of FtsA oligomers<sup>3,14,17</sup>. Instead, our data suggests that FtsN<sub>cyto</sub> supports the

296 formation of a distinct, oligomeric structure of FtsA, possibly to due enhanced lateral  
297 interactions<sup>10</sup>, which results in a higher FRET efficiency for both versions of FtsA.

298

### 299 **Lateral diffusion and membrane binding dynamics contribute to co-treadmilling of FtsA** 300 **with treadmilling FtsZ filaments**

301 Co-treadmilling of FtsA with FtsZ relies on the dynamic exchange of FtsA on the membrane. We  
302 have found that FtsA R286W shows a dramatically shorter residence time and decreased self-  
303 interaction compared to the wildtype protein (**Fig. 3**). These two properties strongly correlate  
304 with a much stronger colocalization with treadmilling FtsZ filaments (**Fig. 1**). To investigate the  
305 respective contributions of membrane binding kinetics and FtsA self-interaction on the  
306 colocalization dynamics with FtsZ, we wanted to create variants of the two FtsA proteins that are  
307 permanently attached to the membrane. We therefore replaced their amphipathic helices by C-  
308 terminal His-tags to obtain FtsA WT(1-405)-6xHis (=FtsA-His) and FtsA R286W (1-405)-6xHis  
309 (=FtsA R286W-His), which we attached to membranes containing different amounts of Tris-NTA  
310 lipids. Accordingly, in these experiments the proteins only differ in their tendency to form  
311 oligomers.

312 When we measured the colocalization of FtsZ with the His-tagged versions of FtsA, we  
313 found that just like for the native proteins, colocalization and co-treadmilling decreased with  
314 increasing FtsA-His densities on the membrane, while they stayed almost constant for FtsA  
315 R286W-His (**Fig. 4a-d**). Furthermore, despite identical densities on the membrane at a given  
316 amount of Tris-NTA lipids, colocalization of FtsA R286W-His with FtsZ was always higher than  
317 for FtsA WT-His, confirming that FtsZ filaments have a higher capacity for FtsA R286W than for  
318 the wildtype protein<sup>10</sup> (**Fig. 1f**). Interestingly, co-treadmilling with FtsZ was about 50% reduced  
319 for FtsA R286W-His compared to the reversibly membrane-binding protein (**Fig. 1f**),  
320 emphasizing that although the fast diffusion of FtsA R286W-His allows for some degree of co-  
321 treadmilling with FtsZ filaments, recruitment of the protein from solution significantly  
322 contributes to its efficiency.

323 To evaluate the degree of FtsA self-interaction in the absence of protein exchange, we  
324 measured the FRET efficiency and diffusion constant of FtsA-His and FtsA R286W-His at different  
325 densities. Similar to the proteins with native membrane binding, His-tagged FtsA R286W showed  
326 lower FRET efficiency and faster diffusion at all densities tested (**Fig. 4e-h and Fig. S4c-S4e**). In  
327 addition, as the FRET efficiency for permanently attached FtsA R286W-His was not higher than  
328 for the reversibly binding protein, we can conclude that faster membrane-binding dynamics are  
329 not a limiting factor for FtsA self-interaction. Conversely, the different FRET efficiencies and  
330 membrane mobilities we observe for FtsA-His and FtsA R286W-His are solely due to the proteins  
331 existing in different oligomeric states.

332

### 333 **A model for the behaviour of FtsA during divisome maturation**

334 Using a minimal set of purified components in combination with quantitative fluorescence  
335 microscopy, we were able to provide new insights into the role of FtsA during the assembly and  
336 activation of the bacterial cell division machinery. We confirmed previous conclusions on the  
337 properties of FtsA and its hyperactive mutant FtsA R286W based on *in vivo* observations. First,  
338 we demonstrate that FtsZ filaments define the spatiotemporal distribution of FtsA WT assemblies  
339 on the membrane<sup>19</sup> and that FtsA R286W stabilizes FtsZ filament reorganization compared to the  
340 wildtype protein<sup>8</sup> (**Fig. 1**). Second, we confirm that FtsA R286W outperforms FtsA WT in the  
341 recruitment of downstream proteins<sup>17</sup> (**Fig. 2**). Furthermore, our results from FRET and single-  
342 molecule experiments support previous findings on the oligomeric nature of FtsA as well as a  
343 decreased self-interaction in case of FtsA R286W<sup>17</sup> (**Fig. 3**).

344 Importantly, our experiments revealed that binding of FtsN<sub>cyto</sub> does not disassemble FtsA  
345 WT oligomers. Instead, we find that the presence of FtsN<sub>cyto</sub> increases FtsA self-interaction in  
346 particular for FtsA R286W. Previous electron microscopy studies found that FtsA is able to form  
347 oligomers of different conformations, such as straight filaments and minirings, but also filament  
348 doublets, which form predominantly in the case of several ZipA suppressor mutants<sup>9,10,36</sup>. It  
349 therefore seems likely that FtsA can oligomerize via different interfaces allowing for lateral and  
350 longitudinal interactions<sup>10</sup>. As longitudinal interactions are compromised in the case of FtsA  
351 R286W<sup>10,36</sup>, binding of FtsN<sub>cyto</sub> likely induces a conformational change that promotes lateral  
352 interactions, enhancing the formation of filament doublets and increasing the FRET efficiency  
353 (**Fig. 3h, 5c**). This FtsN-dependent structural transition of FtsA goes along with an enhanced  
354 recruitment of FtsZ filaments and a decrease of filament reorientation (**Fig. 2h, S2f**). Importantly,  
355 these interpretations are supported by a concurrent study that finds that FtsA switches from  
356 minirings to double filaments upon binding of FtsN (Jan Löwe, MRC LMB, Cambridge, personal  
357 communication).

358 The concentration dependent tendency of FtsA to organize into ring arrays<sup>10</sup> also offers  
359 an explanation for the transition from co-migrating dynamic assemblies towards a stable,  
360 homogeneous protein layer on the membrane (**Fig. 1c, Fig. 3a, Fig. 5a,b**). Conversely, the absence  
361 of rings in case of FtsA R286W can account for its faster membrane exchange as well as the higher  
362 packing density below FtsZ filaments (**Fig. 1g, 3a, 5c**). Importantly, the increased density of FtsA  
363 R286W leads to an enhanced recruitment of FtsN<sub>cyto</sub> (**Fig. 2**) and possibly other downstream  
364 proteins with weak affinities towards FtsA such as FtsQ<sup>4,6,37</sup> and FtsW<sup>12</sup>. This property could  
365 contribute to the ability of FtsA R286W to bypass otherwise essential cell division proteins<sup>17</sup>.

366 Finally, our experiments also shed light on the signalling function of FtsA during  
367 cytokinesis, i.e. its ability to transmit the spatiotemporal information originating from FtsZ

368 filaments in the cytoplasm towards the periplasmic space. This function relies on a close  
369 replication of FtsZ polymerization dynamics by FtsA on the membrane surface, which is the result  
370 of its dynamic exchange by lateral diffusion and via membrane binding and detachment. Both of  
371 these two processes are much faster for FtsA R286W than for FtsA WT (**Fig. 3i, j**). As FtsA R286W  
372 turns over up to two times faster than FtsZ, this membrane anchor can sample the dynamic  
373 filament with a minimal loss of spatiotemporal information<sup>38</sup>. Together, we expect FtsA R286W  
374 to not only be better at directing cell division to midcell, but also at homogeneously distributing  
375 cell wall synthesis around the division site. It will be interesting to study the behavior of single  
376 FtsA molecules *in vivo* and how different exchange dynamics of the membrane anchor correlate  
377 with the ability of treadmilling FtsZ filaments to drive the directional motion of cell division  
378 proteins<sup>39</sup>.

379         With the described benefits of the R286W mutation for the roles of FtsA, the question  
380 arises why it did not persist during evolution. *In vivo*, FtsA R286W produces misaligned and  
381 twisted division septa and minicells. Accordingly, it is possible that the longer residence times of  
382 FtsA WT oligomers, a tighter control of their hypothesized structural reorganization, as well as  
383 the dependency on ZipA as a second membrane anchor provide additional control mechanisms  
384 that increase the precision and robustness of cell division.

385

## 386 References

- 387 1. Trueba, F. J. On the precision and accuracy achieved by *Escherichia coli* cells at fission  
388 about their middle. *Arch. Microbiol.* **131**, 55–59 (1982).
- 389 2. McQuillen, R. & Xiao, J. Insights into the Structure, Function, and Dynamics of the Bacterial  
390 Cytokinetic FtsZ-Ring. *Annu. Rev. Biophys.* **49**, 309–341 (2020).
- 391 3. Du, S. & Lutkenhaus, J. Assembly and activation of the *Escherichia coli* divisome. *Molecular*  
392 *Microbiology* (2017). doi:10.1111/mmi.13696
- 393 4. Baranova, N. *et al.* Diffusion and capture permits dynamic coupling between treadmilling  
394 FtsZ filaments and cell division proteins. *Nature Microbiology* (2020).  
395 doi:10.1038/s41564-019-0657-5
- 396 5. Pichoff, S., Du, S. & Lutkenhaus, J. Disruption of divisome assembly rescued by FtsN–FtsA  
397 interaction in *Escherichia coli*. *Proc. Natl. Acad. Sci.* (2018). doi:10.1073/pnas.1806450115
- 398 6. Karimova, G., Dautin, N. & Ladant, D. Interaction network among *Escherichia coli*  
399 membrane proteins involved in cell division as revealed by bacterial two-hybrid analysis  
400 (Journal of Bacteriology (2005) 187, 7, (2233-2248)). *J. Bacteriol.* **190**, 8248 (2008).
- 401 7. Pichoff, S., Du, S. & Lutkenhaus, J. The bypass of ZipA by overexpression of FtsN requires a  
402 previously unknown conserved FtsN motif essential for FtsA–FtsN interaction supporting  
403 a model in which FtsA monomers recruit late cell division proteins to the Z ring. **4**, 971–  
404 987 (2015).
- 405 8. Geissler, B., Elraheb, D. & Margolin, W. A gain-of-function mutation in *ftsA* bypasses the  
406 requirement for the essential cell division gene *zipA* in *Escherichia coli*. *Proc. Natl. Acad.*  
407 *Sci.* **100**, 4197–4202 (2003).
- 408 9. Szwedziak, P., Wang, Q., Freund, S. M. & Löwe, J. FtsA forms actin-like protofilaments. *EMBO*  
409 *J.* (2012). doi:10.1038/emboj.2012.76
- 410 10. Krupka, M. *et al.* *Escherichia coli* FtsA forms lipid-bound minirings that antagonize lateral  
411 interactions between FtsZ protofilaments. *Nat. Commun.* **8**, 1–12 (2017).
- 412 11. Du, S., Pichoff, S. & Lutkenhaus, J. FtsEX acts on FtsA to regulate divisome assembly and  
413 activity. *Proc. Natl. Acad. Sci.* (2016). doi:10.1073/pnas.1606656113
- 414 12. Park, K.-T., Pichoff, S., Du, S. & Lutkenhaus, J. FtsA acts through FtsW to promote cell wall  
415 synthesis during cell division in *Escherichia coli*. *Proc. Natl. Acad. Sci.* **118**, e2107210118  
416 (2021).
- 417 13. Busiek, K. K. & Margolin, W. A role for FtsA in SPOR-independent localization of the  
418 essential *Escherichia coli* cell division protein FtsN. *Mol. Microbiol.* **92**, 1212–1226 (2014).
- 419 14. Liu, B., Persons, L., Lee, L. & de Boer, P. A. J. Roles for both FtsA and the FtsBLQ subcomplex  
420 in FtsN-stimulated cell constriction in *Escherichia coli*. *Mol. Microbiol.* **95**, 945–970 (2015).
- 421 15. Corbin, B. D., Geissler, B., Sadasivam, M. & Margolin, W. Z-Ring-Independent Interaction

- 422 between a Subdomain of FtsA and Late Septation Proteins as Revealed by a Polar  
423 Recruitment Assay. *J. Bacteriol.* **186**, 7736–7744 (2004).
- 424 16. Geissler, B., Shiomi, D. & Margolin, W. The *ftsA\** gain-of-function allele of *Escherichia coli*  
425 and its effects on the stability and dynamics of the Z ring. *Microbiology* **153**, 814–825  
426 (2007).
- 427 17. Pichoff, S., Shen, B., Sullivan, B. & Lutkenhaus, J. FtsA mutants impaired for self-interaction  
428 bypass ZipA suggesting a model in which FtsA's self-interaction competes with its ability  
429 to recruit downstream division proteins. *Mol. Microbiol.* (2012). doi:10.1111/j.1365-  
430 2958.2011.07923.x
- 431 18. Bernard, C. S., Sadasivam, M., Shiomi, D. & Margolin, W. An altered FtsA can compensate  
432 for the loss of essential cell division protein FtsN in *Escherichia coli*. *Mol. Microbiol.* (2007).  
433 doi:10.1111/j.1365-2958.2007.05738.x
- 434 19. Addinall, S. G. & Lutkenhaus, J. FtsA is localized to the septum in an FtsZ-dependent  
435 manner. *J. Bacteriol.* **178**, 7167–7172 (1996).
- 436 20. Bisson-Filho, A. W. *et al.* Treadmilling by FtsZ filaments drives peptidoglycan synthesis and  
437 bacterial cell division. *Science (80-. )*. **355**, 739–743 (2017).
- 438 21. Loose, M. & Mitchison, T. J. The bacterial cell division proteins *ftsA* and *ftsZ* self-organize  
439 into dynamic cytoskeletal patterns. *Nat. Cell Biol.* **16**, 38–46 (2014).
- 440 22. Rueda, S., Vicente, M. & Mingorance, J. Concentration and assembly of the division ring  
441 proteins FtsZ, FtsA, and ZipA during the *Escherichia coli* cell cycle. *J. Bacteriol.* **185**, 3344–  
442 51 (2003).
- 443 23. Caldas, P., López-pelegrín, M., Pearce, D. J. G., Budanur, N. B. & Brugués, J. ZapA stabilizes  
444 FtsZ filament bundles without slowing down treadmilling dynamics. (2019).
- 445 24. Beuria, T. K. *et al.* Adenine nucleotide-dependent regulation of assembly of bacterial  
446 tubulin-like FtsZ by a hypermorph of bacterial actin-like FtsA. *J. Biol. Chem.* **284**, 14079–  
447 86 (2009).
- 448 25. Caldas, P., Radler, P., Sommer, C. & Loose, M. *Computational analysis of filament*  
449 *polymerization dynamics in cytoskeletal networks. Methods in Cell Biology* **158**, (Elsevier  
450 Inc., 2020).
- 451 26. Wang, H. & Gayda, R. High Level Expression of the FtsA Protein inhibits Cell septation in *E*  
452 *coli* K12. *J. Bacteriol.* **172**, 4736–4740 (1990).
- 453 27. Dai, K. & Lutkenhaus, J. The proper ratio of FtsZ to FtsA is required for cell division to occur  
454 in *Escherichia coli*. *J. Bacteriol.* **174**, 6145–6151 (1992).
- 455 28. Wang, H., Henk, M. C. & Gayda, R. C. Overexpression of *ftsA* induces large bulges at the  
456 septal regions in *Escherichia coli*. *Curr. Microbiol.* **26**, 175–181 (1993).
- 457 29. Löwe, J. & van den Ent, F. Conserved sequence motif at the C-terminus of the bacterial cell-

- 458 division protein FtsA. *Biochimie* **83**, 117–20 (2001).
- 459 30. Du, S., Henke, W., Pichoff, S. & Lutkenhaus, J. How FtsEX localizes to the Z ring and interacts  
460 with FtsA to regulate cell division. *Mol. Microbiol.* **112(3)**, 881-895 (2019).
- 461 31. Geissler, B., Shiomi, D. & Margolin, W. The ftsA\* gain-of-function allele of Escherichia coli  
462 and its effects on the stability and dynamics of the Z ring. *Microbiology* **153**, 814–825  
463 (2007).
- 464 32. Verveer, P. J., Rocks, O., Harpur, A. G. & Bastiaens, P. I. H. Imaging Protein Interactions by  
465 FRET Microscopy: FRET Measurements by Acceptor Photobleaching. *Cold Spring Harb.*  
466 *Protoc.* **2006**, pdb.prot4598-pdb.prot4598 (2006).
- 467 33. Loose, M., Fischer-Friedrich, E., Herold, C., Kruse, K. & Schwille, P. Min protein patterns  
468 emerge from rapid rebinding and membrane interaction of MinE. *Nat. Struct. Mol. Biol.* **18**,  
469 577–583 (2011).
- 470 34. Hernández-Rocamora, V. M. *et al.* Real-time monitoring of peptidoglycan synthesis by  
471 membrane-reconstituted penicillin-binding proteins. *Elife* **10**, (2021).
- 472 35. Gerganova, V. *et al.* Cell patterning by secretion-induced plasma membrane flows. *Sci. Adv.*  
473 **7**, 1–19 (2021).
- 474 36. Schoenemann, K. M. *et al.* Gain-of-function variants of FtsA form diverse oligomeric  
475 structures on lipids and enhance FtsZ protofilament bundling. *Mol. Microbiol.* **109**, 676–  
476 693 (2018).
- 477 37. Du, S. & Lutkenhaus, J. Assembly and activation of the Escherichia coli divisome. *Mol.*  
478 *Microbiol.* **105**, 177–187 (2017).
- 479 38. Shannon, C. E. Communication in the Presence of Noise. *Proc. IRE* **37**, 10–21 (1949).
- 480 39. McCausland, J. W. *et al.* Treadmilling FtsZ polymers drive the directional movement of sPG-  
481 synthesis enzymes via a Brownian ratchet mechanism. *Nat. Commun.* **12**, 609 (2021).
- 482

483 **Acknowledgments**

484 We acknowledge members of the Loose laboratory at IST Austria for helpful discussions—in  
485 particular L. Lindorfer for his assistance with cloning and purifications. We thank J. Löwe and T.  
486 Nierhaus (MRC-LMB Cambridge, UK) for sharing unpublished work and helpful discussions, as  
487 well as D. Vavylonis and D. Rutkowski (Lehigh University, Bethlehem, PA, USA) as well as S. Martin  
488 (University of Lausanne, Switzerland)) for sharing their code for FRAP analysis. We are also  
489 thankful for the support by the Scientific Service Units (SSU) of IST Austria through resources  
490 provided by the Bioimaging Facility (BIF) and the Lab Support Facility (LSF). This work was  
491 supported by the European Research Council through grant ERC 2015-StG-679239 and by the  
492 Austrian Science Fund (FWF) StandAlone P34607 to M.L. and HFSP LT 000824/2016-L4 to N.B.  
493 For the purpose of open access, we have applied a CC BY public copyright licence to any Author  
494 Accepted Manuscript version arising from this submission.'

495



496 **Figures**

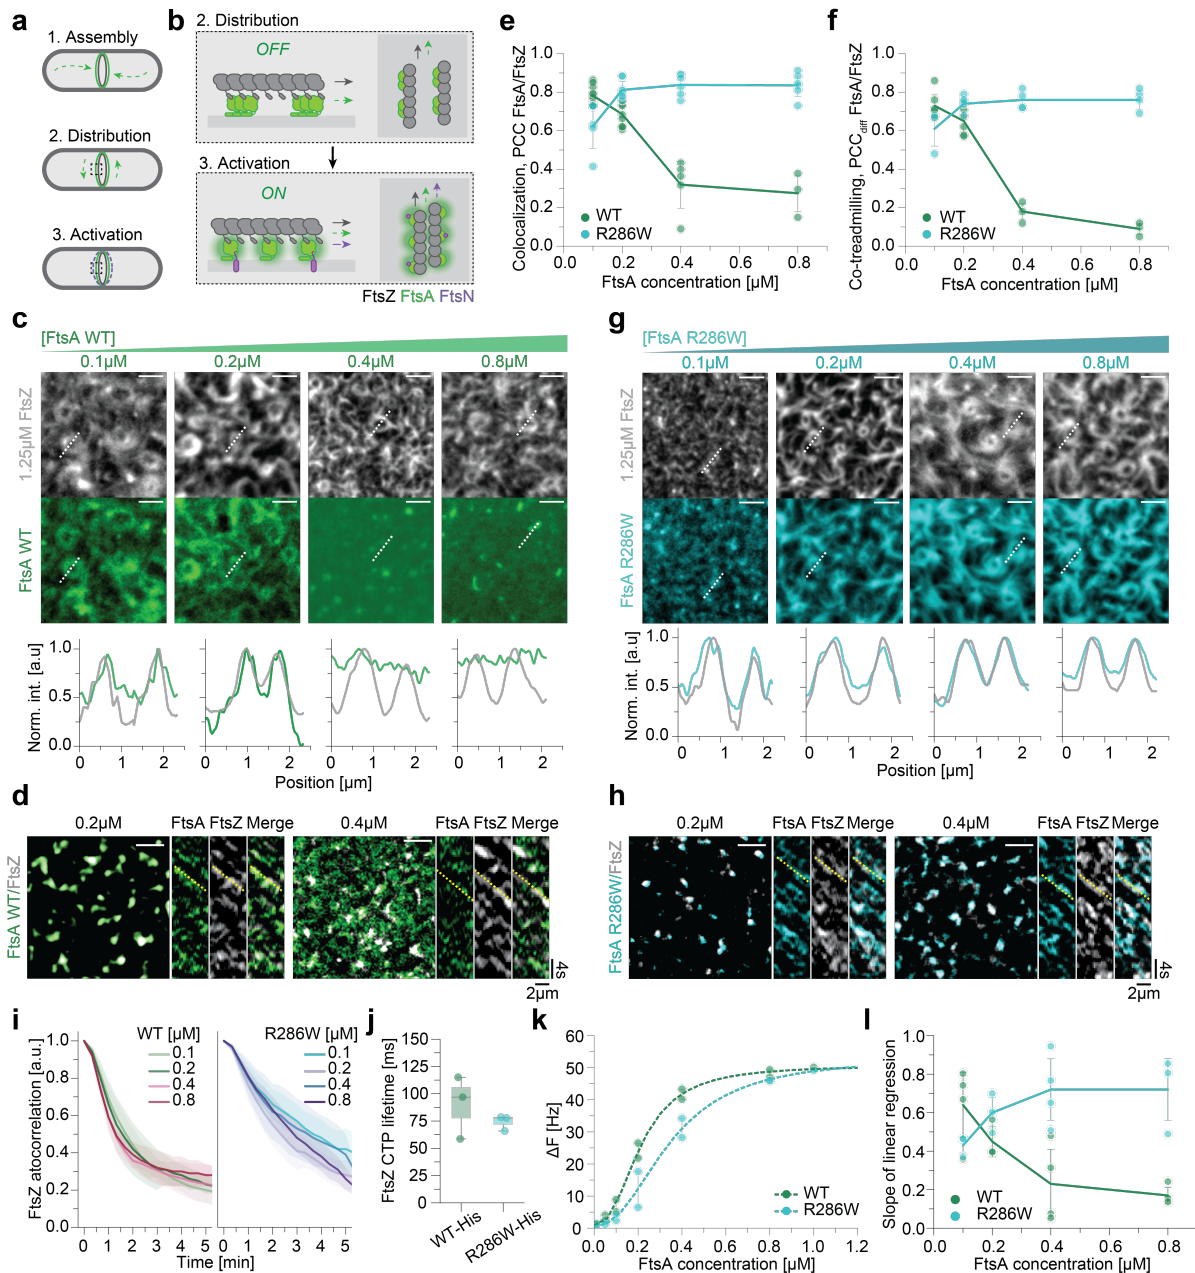

497

**Figure 1: Membrane patterning of FtsA by treadmilling filaments of FtsZ**

**a, b**, FtsA anchors FtsZ filaments to the cytosolic membrane of *E. coli*. Treadmilling of FtsZ distributes FtsA around midcell. **b**, Binding of FtsN is thought to switch FtsA from an oligomeric *off* state to the monomeric *on* state. FtsA activation triggers recruitment of divisome proteins and constriction. **c**, Representative micrographs of A488-FtsZ (grey) and Cy5-FtsA WT (green) at increasing FtsA WT and constant FtsZ concentration (1.25  $\mu$ M). Intensity profiles correspond to dashed white lines. **d**, Representative micrographs showing merged differential images of

FtsA WT with FtsZ for 0.2  $\mu\text{M}$  (left) and 0.4  $\mu\text{M}$  (right) FtsA. Yellow lines in kymographs indicate the slope for treadmilling FtsZ. Above 0.2  $\mu\text{M}$  FtsA WT fails to replicate FtsZ dynamics. **e**, Colocalization of FtsA/FtsZ quantified by PCC shows that colocalization of FtsA WT (green) and R286W (cyan) with FtsZ starts to differ significantly at 0.4  $\mu\text{M}$  ( $0.32 \pm 0.12$ ;  $0.84 \pm 0.05$ ; p-value:  $1.28 \cdot 10^{-5}$ ). **f**, Dynamic colocalization of FtsA/FtsZ quantified by  $\text{PCC}_{\text{diff}}$ . FtsA R286W follows FtsZ treadmilling more efficiently than FtsA WT at FtsA concentrations above 0.2  $\mu\text{M}$  ( $0.18 \pm 0.04$ ;  $0.76 \pm 0.04$ ; p-value:  $1.82 \cdot 10^{-4}$ ). **g**, Representative micrographs of A488-FtsZ (grey) and Cy5-FtsA R286W (cyan) at increasing FtsA R286W and constant FtsZ concentration (1.25  $\mu\text{M}$ ). FtsA R286W colocalizes with FtsZ filaments at all tested concentrations. Intensity profiles correspond to dashed white lines. **h**, Representative micrographs showing merged differential images of FtsA R286W with FtsZ for 0.2  $\mu\text{M}$  (left) and 0.4  $\mu\text{M}$  (right) FtsA. Yellow lines in kymographs indicate the slope for treadmilling FtsZ. FtsA R286W replicate FtsZ dynamics more robustly. **i**, The FtsZ network is more persistent in the presence of FtsA R286W, indicated by a slower decay of the autocorrelation. FtsZ persistency decreases slightly with higher FtsA WT concentrations (left), whereas it remains stable with FtsA R286W (right). **j**, The FtsZ-C-terminal peptide has the same lifetime on FtsA WT-His6 or R286W-His6 on membranes with 1% Tris-NTA lipids ( $90.16 \pm 23.53\text{ms}$ ;  $74.01 \pm 5.80\text{ms}$ ; p-value: 0.40). **k**, QCM-D experiments reveal that FtsA R286W binds slightly weaker to bilayers compared to FtsA WT ( $0.32 \pm 0.05\mu\text{M}$  vs  $0.21 \pm 0.01\mu\text{M}$ , p-value: 0.15). However, the membrane density is saturated with both FtsA variants at 0.8  $\mu\text{M}$ . **l**, The slope of the linear regression is proportional to the [FtsZ] vs. [FtsA] ratio. With increasing FtsA WT concentrations this slope decreases, while it remains high for FtsA R286W. Scale bars in all micrographs are 2 $\mu\text{m}$ .

498

499

500

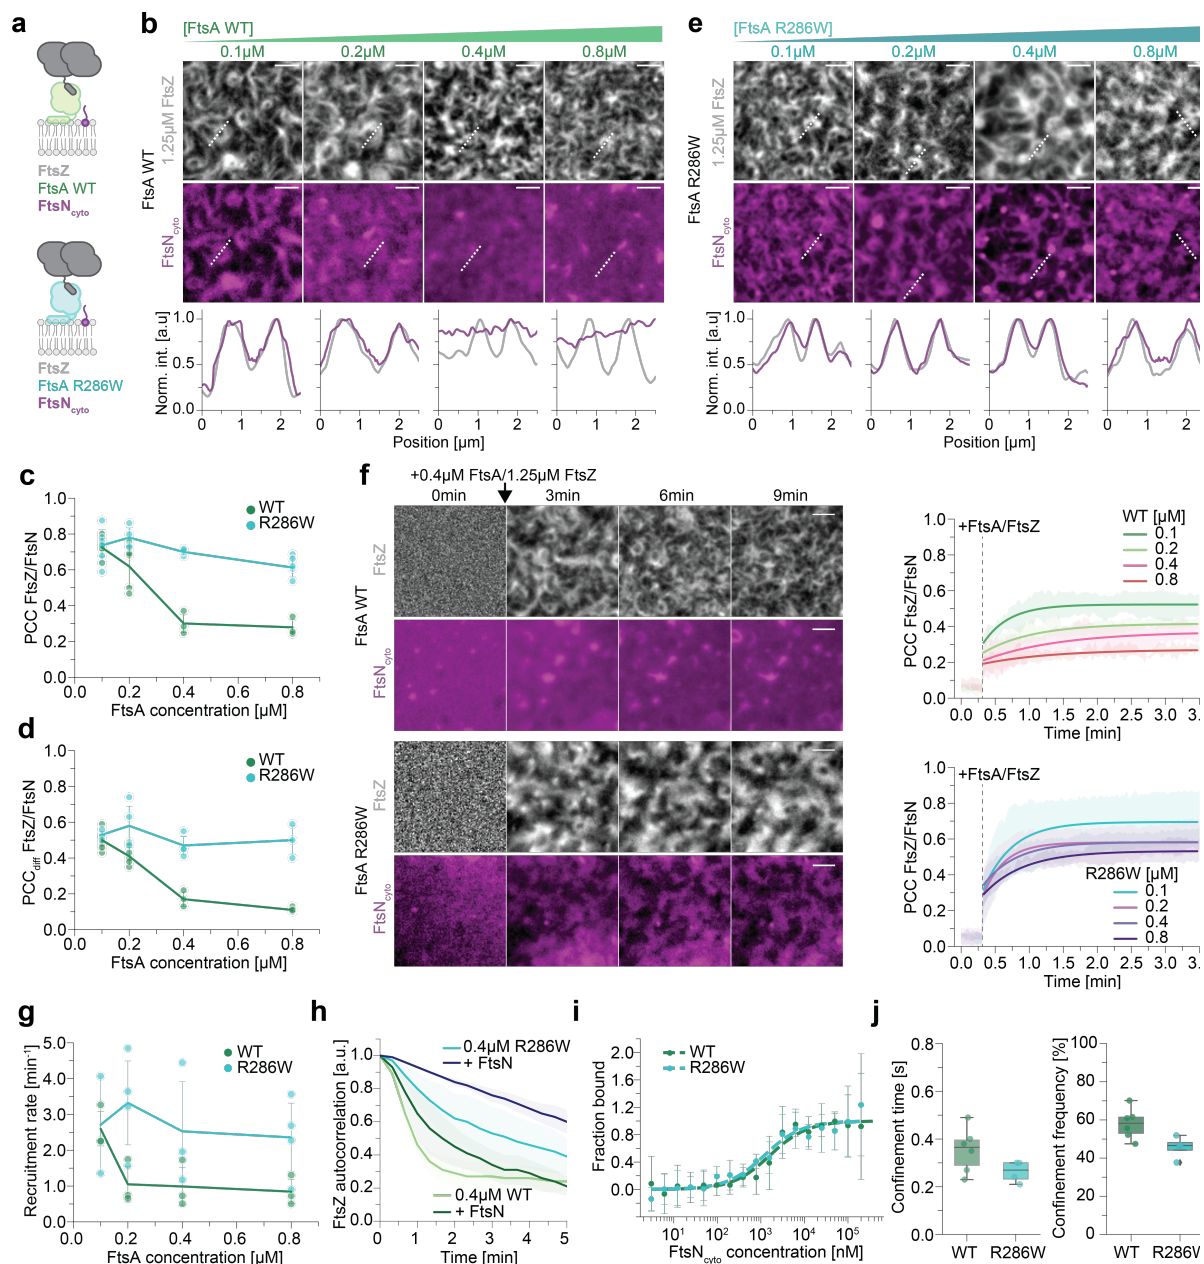

**Figure 2: FtsA R286W shows enhanced recruitment of FtsN<sub>cyto</sub> to FtsZ filaments**

**a**, Cartoon illustrating which components are present in the TIRF experiment (**b** and **e**) and which are labeled (= bold text). **b**, Representative micrographs of A488-FtsZ (grey) and Cy5-FtsN<sub>cyto</sub> (magenta) at increasing FtsA WT and constant FtsZ concentration. FtsN<sub>cyto</sub> colocalizes well with FtsZ filaments up to 0.2 μM FtsA WT, but fails at higher concentrations. The line profiles correspond to the dashed white lines. **c**, Colocalization of FtsZ/FtsN quantified by PCC, shows that colocalization of FtsZ with FtsN differs significantly at FtsA concentrations above 0.2 μM (FtsA WT:  $0.30 \pm 0.05$ ; FtsA R286W:  $0.70 \pm 0.02$ ; p-value:  $4.92 \cdot 10^{-4}$ ). **d** Dynamic colocalization of FtsZ/FtsN quantified by ΔPCC. FtsN<sub>cyto</sub> follows FtsZ treadmilling more efficient with FtsA R286W at concentrations above 0.2 μM ( $0.17 \pm 0.04$ ;  $0.47 \pm 0.05$ ; p-value:  $3.79 \cdot 10^{-3}$ ).

**e**, Representative micrographs of A488-FtsZ (grey) and Cy5-FtsN<sub>cyto</sub> (magenta) at increasing FtsA R286W and constant FtsZ concentration. FtsN<sub>cyto</sub> colocalizes well with FtsZ at all tested FtsA R286W concentrations. The line profiles correspond to the dashed white lines. **f**, Top: From a homogeneous distribution, Cy5-FtsN<sub>cyto</sub> (magenta) does not colocalize with FtsZ filaments on the membrane after the addition of 1.25 μM A488-FtsZ (grey) and 0.4 μM FtsA WT at 0 min. Bottom: The same experiment with 0.4 μM FtsA R286W reveals that Cy5-FtsN<sub>cyto</sub> colocalizes well with FtsZ filaments after protein addition at 0 min. Right: Mean values of PCC versus time at different FtsA WT and R286W concentrations. FtsN<sub>cyto</sub> is recruited to FtsZ filaments at all tested FtsA R286W concentrations, but the PCC remains low at FtsA WT concentrations above 0.2 μM. **g**, Quantification of the recruitment rate of FtsN<sub>cyto</sub> towards FtsZ filaments, extracted from experiments in **f** by fitting a power law exponential. FtsA R286W (cyan) recruits FtsN<sub>cyto</sub> consistently fast at all concentrations, whereas the recruitment rate decreases for FtsA WT (green) above 0.2 μM ( $1.05 \pm 0.49$ ;  $3.32 \pm 1.17$ ; p-value: 0.045). **h**, Presence of FtsN<sub>cyto</sub> increases the persistency of the FtsZ network drastically. This effect is observed with both FtsA variants. **i**, Quantification of the binding affinity of FtsN<sub>cyto</sub> towards FtsA WT or R286W by MST shows that there is no difference ( $1.58 \pm 0.43$  mM and  $1.17 \pm 0.37$  mM respectively). **j**, Quantification of FtsN<sub>cyto</sub> confinement events to FtsA/FtsZ cofilaments by single molecule tracking. While the confinement period for FtsN<sub>cyto</sub> is slightly, but not significantly longer in the presence of FtsA WT ( $0.35 \pm 0.09$ s vs.  $0.26 \pm 0.04$ s) the confinement frequency is increased significantly for FtsA WT ( $57.99 \pm 7.29\%$ ;  $45.70 \pm 5.10$ ; p-value: 0.03).

502

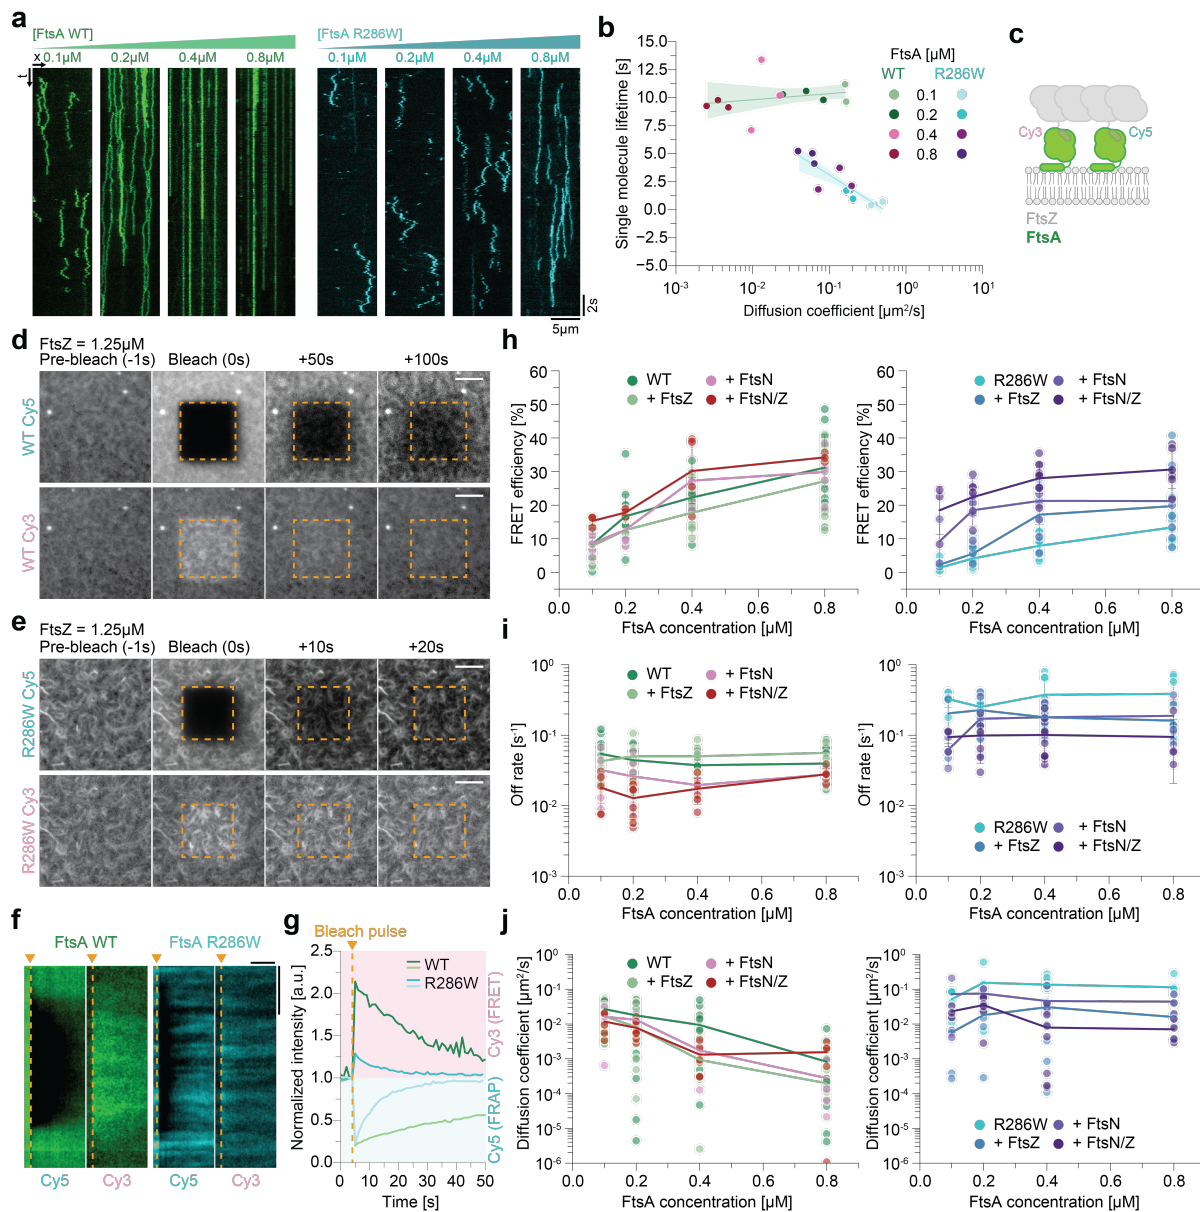

**Figure 3: FtsA R286W shows faster membrane exchange than FtsA WT, while the self-interaction of both proteins is enhanced in the presence of FtsN<sub>cyto</sub>.**

**a**, Representative kymographs of single molecules of Cy5-FtsA WT (green) and Cy5-FtsA R286W (cyan) at increasing concentrations. FtsA WT remains immobile above 0.2  $\mu\text{M}$ , while FtsA R286W slows down, but displays diffusive behavior at all concentrations shown. **b**, The diffusion coefficient of FtsA WT decreases with increasing concentrations ( $0.14 \pm 0.04 \mu\text{m}^2/\text{s}$  to  $0.004 \pm 0.0009 \mu\text{m}^2/\text{s}$ ) while its lifetime remains stable ( $10.21 \pm 0.70 \text{ s}$  to  $9.40 \pm 0.28 \text{ s}$ ). The diffusion coefficient of FtsA R286W also decreases, but is still 10x higher than for FtsA WT ( $0.41 \pm 0.06 \mu\text{m}^2/\text{s}$  to  $0.05 \pm 0.01 \mu\text{m}^2/\text{s}$ ). The lifetime also increases, but remains lower compared to FtsA WT ( $0.54 \pm 0.14 \text{ s}$  vs.  $4.80 \pm 0.49 \text{ s}$ ). **c**, Schematic of the experiment to measure FRET between FtsA labeled either with Cy3 or Cy5. **d**, Representative micrographs of FRET assay

performed by acceptor photobleaching (Cy5-FtsA WT) in the presence of the donor Cy3- FtsA WT, mixed in the ratio 1:1. Top: The fluorescence signal of Cy5-FtsA WT recovers within 100s. Bottom: The corresponding increase in Cy3-FtsA WT intensity is strong and long-lived. **e**, Representative micrograph of an acceptor photobleaching experiment of Cy3/Cy5-FtsA R286W + FtsZ. Top: The fluorescence signal of Cy5-FtsA R286W recovers within 20s. Bottom: The corresponding increase in Cy3-FtsA R286W intensity is weak. Scale bars in **d** and **e** are 5  $\mu\text{m}$ . **f**, Kymographs depicting the differences in FRAP recovery (left), as well as the duration of the FRET signal (right) for FtsA WT (green) and FtsA R286W (cyan). Scale bars are 4  $\mu\text{m}$  and 20 sec, respectively. **g**, Representative examples of FRAP recovery (bottom, grey rectangle) and FRET increase curves (top, pink rectangle) for FtsA WT (green) and R286W (cyan). **h**, Left: FRET of FtsA WT increases at higher concentrations (from  $8.11 \pm 4.43\%$  to  $30.63 \pm 9.86\%$ ). Addition of FtsZ slightly decreases measured FRET efficiency, but not significantly ( $22.14 \pm 5.73\%$  for WT alone vs.  $17.74 \pm 7.31\%$  in FtsZ presence, p-value: 0.17 at  $0.4\mu\text{M}$ ). The presence of FtsN<sub>cyto</sub> and FtsZ/FtsN<sub>cyto</sub> increases the self-interaction ( $22.14 \pm 5.73\%$  vs  $27.29 \pm 7.13\%$  with FtsN<sub>cyto</sub> and  $30.17 \pm 9.64\%$  with FtsZ/FtsN<sub>cyto</sub> at  $0.4\mu\text{M}$ , p-values: 0.16 and 0.05). Right: FtsA R286W FRET also increases with concentration, but is constantly significantly lower than for FtsA WT ( $1.35 \pm 1.19\%$  to  $13.36 \pm 4.59\%$ ). FtsZ increases FRET slightly, while FtsN<sub>cyto</sub> drastically increases measured FRET ( $8.09 \pm 2.79\%$  vs  $18.19 \pm 8.78\%$  with FtsZ and  $21.26 \pm 6.98\%$  with FtsN<sub>cyto</sub> at  $0.4\mu\text{M}$ ; p-values:  $1.4 \cdot 10^{-3}$  and  $2.03 \cdot 10^{-5}$  respectively). With both, FtsZ and FtsN<sub>cyto</sub>, the FRET signal of WT and R286W are indistinguishable ( $30.17 \pm 0.9.64\%$  vs.  $28.01 \pm 4.62\%$  at  $0.4\mu\text{M}$ ). **i**, Left: Off-rates remain constantly slow with increasing concentrations of FtsA WT ( $0.054 \pm 0.025\text{ s}^{-1}$  to  $0.039 \pm 0.019\text{ s}^{-1}$ ). Presence of FtsN and FtsZ/FtsN decreases the off-binding rate of FtsA WT ( $0.038 \pm 0.012\text{ s}^{-1}$  vs.  $0.019 \pm 0.004\text{ s}^{-1}$  and  $0.017 \pm 0.007\text{ s}^{-1}$  at  $0.4\mu\text{M}$ ; p-values:  $6.5 \cdot 10^{-3}$  and  $1.55 \cdot 10^{-3}$ ). Right: Off- binding rates remain constantly fast with increasing concentrations of FtsA R286W ( $0.33 \pm 0.08\text{ s}^{-1}$  to  $0.39 \pm 0.26\text{ s}^{-1}$ ). FtsN and FtsZ/FtsN decrease off-binding rate of FtsA R286W ( $0.37 \pm 0.24\text{ s}^{-1}$  vs.  $0.179 \pm 0.07\text{ s}^{-1}$  and  $0.10 \pm 0.06\text{ s}^{-1}$  at  $0.4\mu\text{M}$  FtsA R286W; p-values: 0.1 and 0.007). However, FtsA R286W is still more dynamic than FtsA WT ( $0.02 \pm 0.006\text{ s}^{-1}$  vs.  $0.10 \pm 0.074\text{ s}^{-1}$  at  $0.8\mu\text{M}$  with FtsZ/N). **j**, Left: Diffusion coefficient drops with increasing concentrations of FtsA WT ( $0.027 \pm 0.018\text{ }\mu\text{m}^2/\text{s}$  to  $0.0008 \pm 0.0017\text{ }\mu\text{m}^2/\text{s}$ ). Additional components slightly decrease the mobility ( $0.009 \pm 0.01\text{ }\mu\text{m}^2/\text{s}$  vs  $0.0009 \pm 0.0008\text{ }\mu\text{m}^2/\text{s}$  and  $0.0013 \pm 0.001\text{ }\mu\text{m}^2/\text{s}$  for FtsA WT and with FtsN<sub>cyto</sub> or FtsZ/FtsN<sub>cyto</sub> respectively, p-values: 0.22 and 0.16). Right: Diffusion coefficient remains unchanged at increased concentrations of FtsA R286W ( $0.052 \pm 0.034\text{ }\mu\text{m}^2/\text{s}$  to  $0.114 \pm 0.07\text{ }\mu\text{m}^2/\text{s}$ ). The presence of FtsN, FtsZ individually and together slow down diffusion of FtsA R286W ( $0.14 \pm 0.07\text{ }\mu\text{m}^2/\text{s}$  vs  $0.046 \pm 0.036\text{ }\mu\text{m}^2/\text{s}$  and  $0.0079 \pm 0.01\text{ }\mu\text{m}^2/\text{s}$  for FtsA R286W alone and with FtsN<sub>cyto</sub> or FtsZ/FtsN<sub>cyto</sub> respectively, p-values: 0.03 and  $3.25 \cdot 10^{-4}$ ). However,  $D_{\text{coef}}$  remains still

higher than for FtsA WT ( $0.0015 \pm 0.0011 \mu\text{m}^2/\text{s}$  vs.  $0.007 \pm 0.0043 \mu\text{m}^2/\text{s}$  at  $0.8 \mu\text{M}$  with FtsZ/N).

503

504

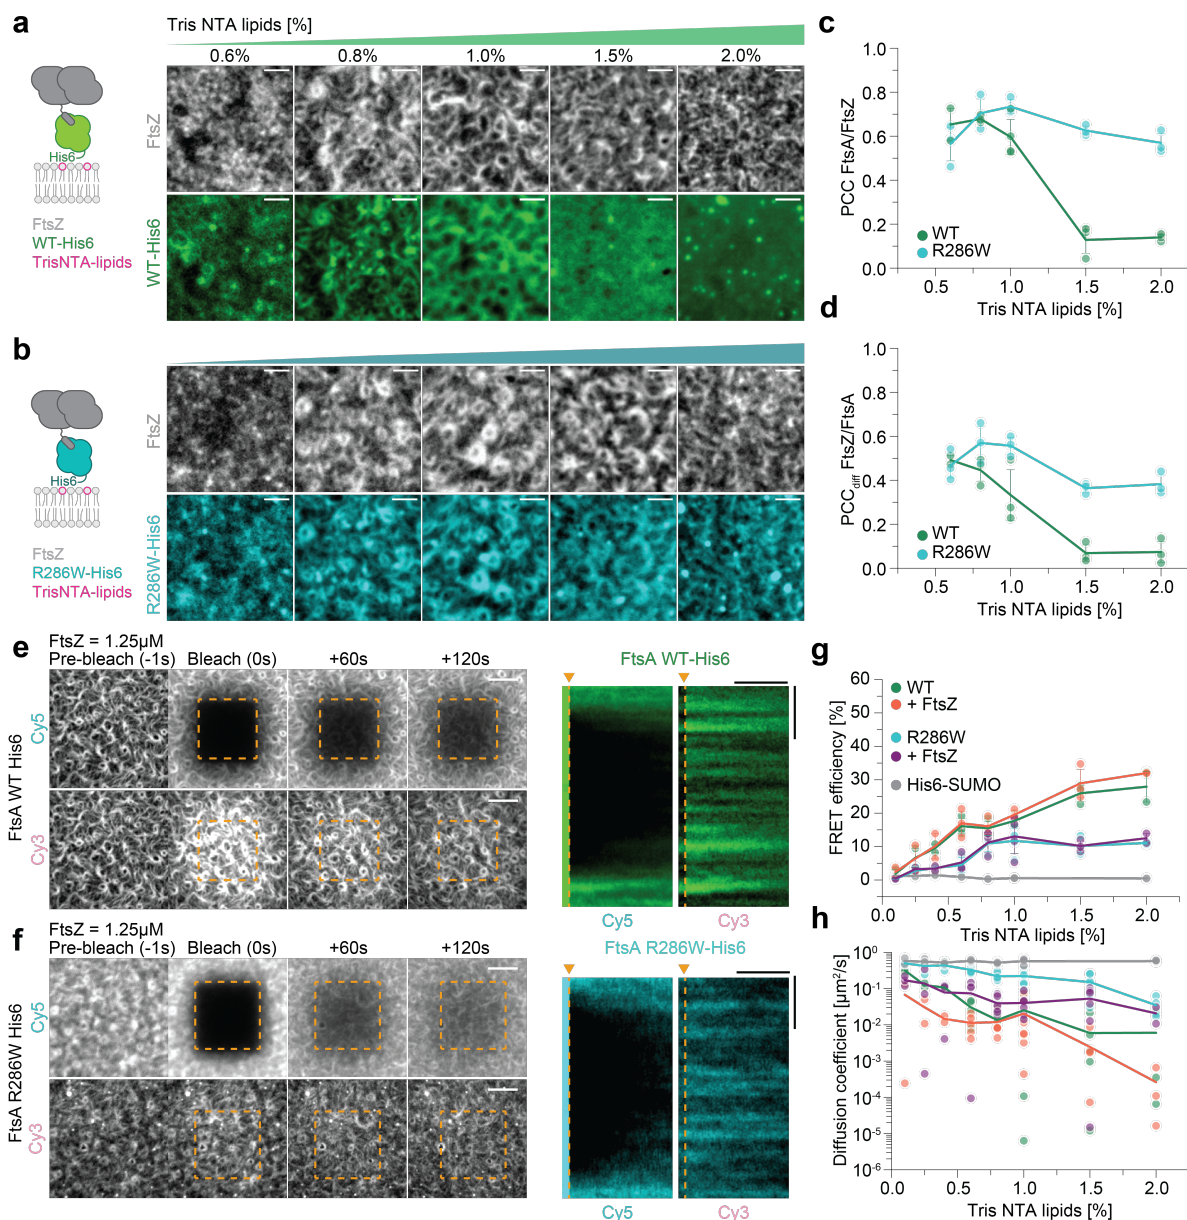

**Figure 4: Membrane diffusion and protein binding dynamics contribute to co-treadmilling of FtsA with treadmilling filaments of FtsZ**

**a**, Representative micrographs of A488-FtsZ (grey) and Cy5-FtsA WT-His6 (green) at increasing Tris-NTA lipid concentrations. With more than 1% Tris-NTA lipids FtsA WT-His6 does not colocalize to FtsZ filaments. **b**, Representative micrographs of A488-FtsZ (grey) and Cy5- FtsA R286W-His6- (cyan) at increasing Tris-NTA concentrations. **c**, Colocalization of FtsA-His6/FtsZ quantified by PCC. Above 1% Tris-NTA lipids the colocalization of His-tagged FtsAs with FtsZ differs significantly ( $0.13 \pm 0.06$ ;  $0.63 \pm 0.02$ ; p-value:  $3.86 \cdot 10^{-4}$ ). **d**, Dynamic colocalization FtsA-His6/FtsZ quantified by PCC<sub>diff</sub>. With more than 1% Tris-NTA lipids the co-treadmilling of His-tagged FtsAs with FtsZ differs significantly ( $0.07 \pm 0.04$ ;  $0.36 \pm 0.02$ ; p-value:  $5.70 \cdot 10^{-4}$ ). **e,f**, Representative micrographs of acceptor bleaching recovery and donor



intensity increase of FtsA WT-His6 (**e**) and FtsA R286W-His6 (**f**). Right: Kymographs depicting the FRAP recovery, as well as the duration of the FRET signal for FtsA WT-His6 (green) and FtsA R286W-His6 (cyan). **g**, FRET of His-tagged FtsAs and the His6-SUMO control. FRET for His-SUMO is not detected, whereas His-tagged FtsAs self-interaction rises with increasing protein density. FRET signal of FtsA WT is significantly higher compared to FtsA R286W-His6. The presence of FtsZ has no significant effect on the measured self-interaction. **h**, Diffusion coefficient of His-tagged FtsAs  $\pm$  FtsZ and the His6-SUMO control. While the mobility of His6-SUMO remains constant, the diffusion of His-tagged FtsAs decreases at higher protein density.

506

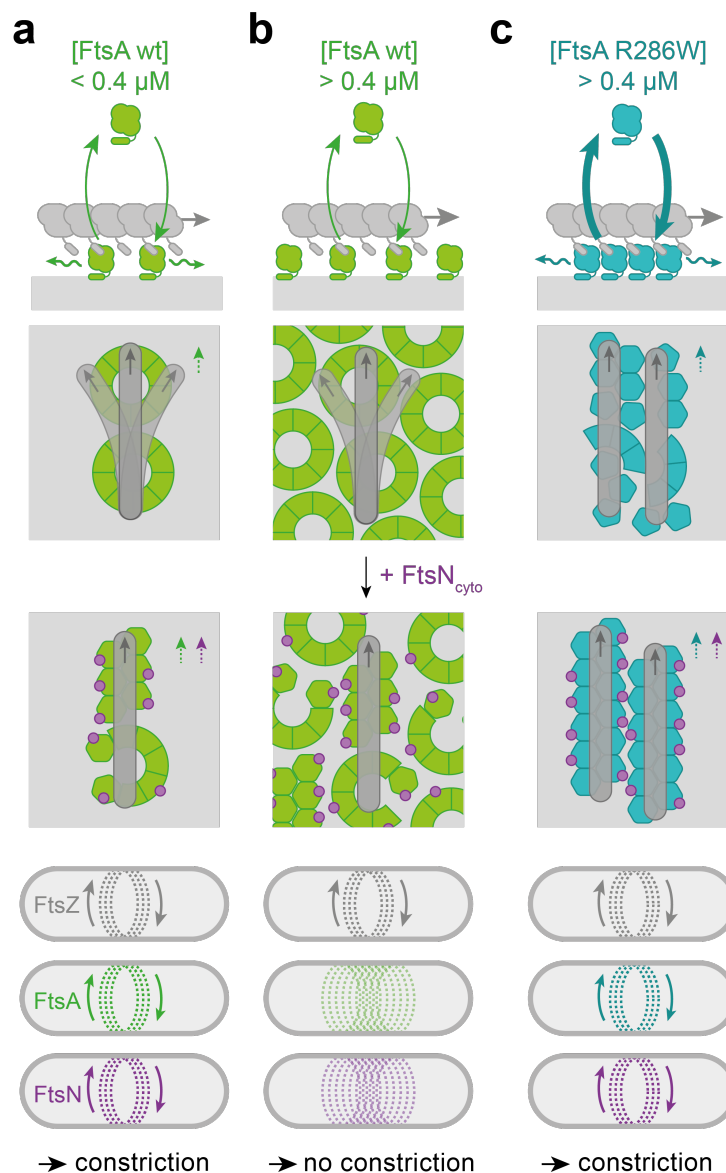

**Figure 5: A model for the behavior of FtsA during divisome activation.**

FtsA and FtsZ form co-treadmilling filaments on the membrane surface. The spatiotemporal distribution of FtsA on the membrane relies on its dynamic interaction with FtsZ filaments and the lipid membrane as well as its exchange by lateral diffusion. Grey arrows indicated treadmilling direction, curved arrows the dynamic exchange of FtsA to and from the membrane, wavy arrows represent lateral diffusion, dashed arrows indicate co-treadmilling of FtsA and FtsN. **a**, At low FtsA WT concentrations, i.e. at a protein ratio found *in vivo* ([FtsA WT] = 0.2  $\mu\text{M}$ , [FtsZ] = 1.25  $\mu\text{M}$ ), fast diffusion of membrane-bound FtsA allows for co-treadmilling with FtsZ filaments despite slow cycling on and off the membrane. The presence of FtsA minirings limits the packing density and therefore the amount of FtsA recruited to the filament. Furthermore, it allows for a continuous realignment of treadmilling filaments. Recruitment of

FtsN<sub>cyto</sub> does not depolymerize FtsA oligomers, but supports a conformational change that prevents reorganization of filaments. While FtsZ, FtsA and downstream division proteins are dynamically moving around the cell, they distribute cell wall synthesis allowing for cell constriction. **b**, At higher concentrations, FtsA forms a continuous array of minirings on the membrane, stabilized by lateral interactions. Due to the absence of diffusion, FtsA cannot follow FtsZ treadmilling dynamics and fails to distribute cell wall synthesis. As a result, the cell fails to divide. **c**, Even at high concentrations of FtsA R286W, its fast exchange allows for a close replication of FtsZ filament dynamics on the membrane surface. Loss of longitudinal interactions in this mutant disrupts minirings, allowing for a higher packing density of FtsA which limits the realignment of filaments. Binding of FtsN enhances lateral interactions to promote a structural change that further limits realignment of filaments. As all proteins are dynamically moving around the cell, constriction and cell division is possible even at elevated levels of FtsA R286W.

507

508

## 509 Supplementary Figures

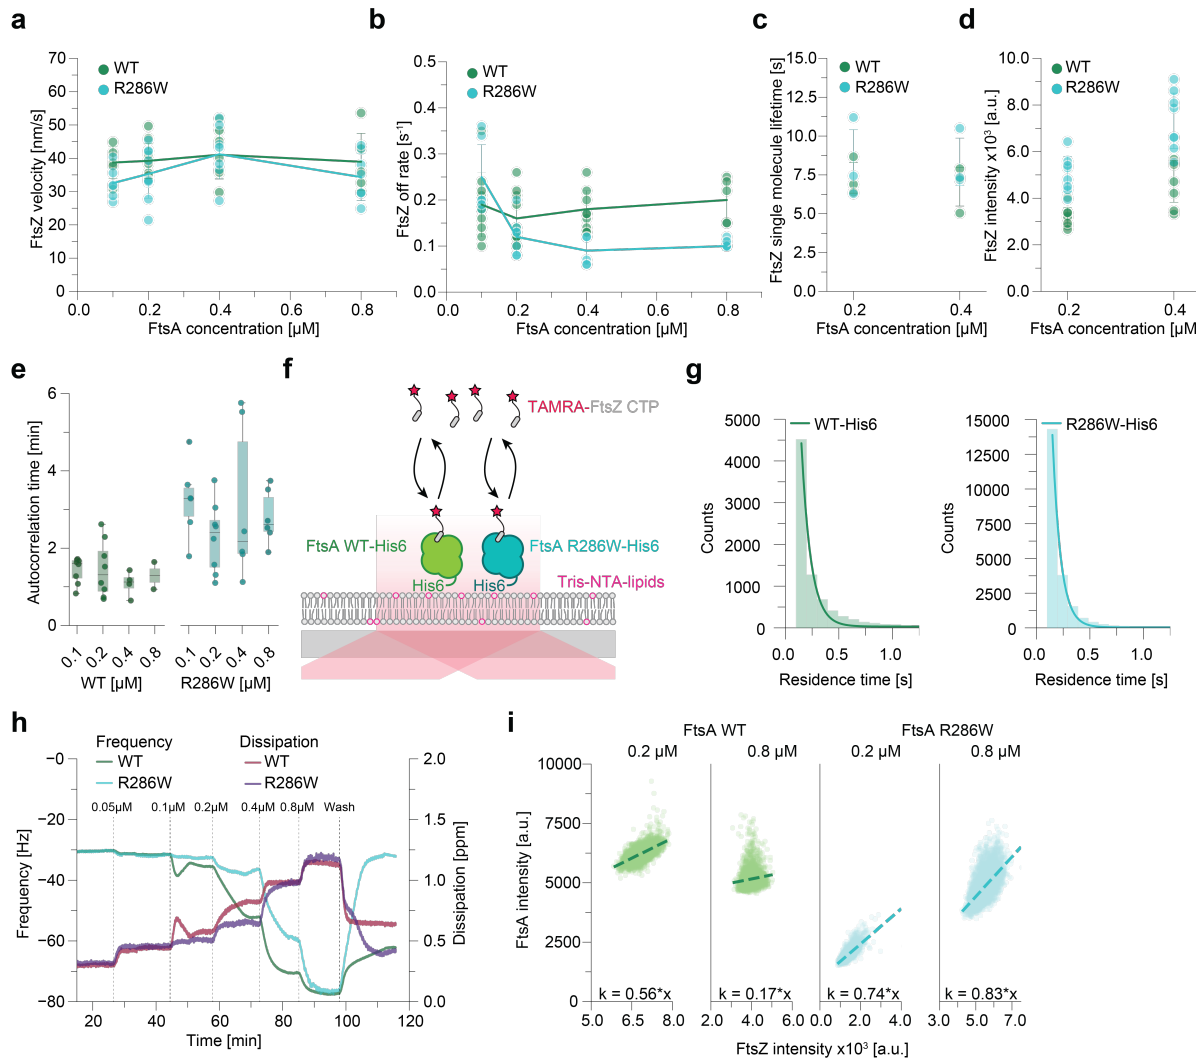

**Figure S1: FtsZ dynamics are identical with FtsA WT and R286W, more FtsZ is recruited by FtsA R286W**

**a**, FtsZ treadmilling velocity is identical in the presence of FtsA WT or R286W at all concentrations tested ( $38.95 \pm 8.51$  nm/s vs.  $34.35 \pm 7.08$  nm/s at  $0.8 \mu\text{M}$ ; p-value: 0.40). **b**, At lower FtsA concentrations, the off-rate of FtsZ is similar to FtsA WT and R286W. At  $0.8 \mu\text{M}$  FtsAs, FtsZ remains bound longer with FtsA R286W ( $0.20 \pm 0.04 \text{ s}^{-1}$  and  $0.11 \pm 0.01 \text{ s}^{-1}$ , p-value:  $9.12 \cdot 10^{-4}$ ). **c**, Single molecule lifetime of FtsZ is similar at  $0.2 \mu\text{M}$  ( $7.31 \pm 0.98 \text{ s}$  and  $8.31 \pm 2.10 \text{ s}$ , p-value: 0.58) and  $0.4 \mu\text{M}$  FtsA ( $6.73 \pm 1.23 \text{ s}$  and  $8.34 \pm 1.53 \text{ s}$ , p-value: 0.31). **d**, FtsA R286W recruits more FtsZ to the membrane than FtsA WT (p-value:  $4.94 \cdot 10^{-5}$ ). **e**, The persistency of the FtsZ pattern is lower with FtsA WT compared to FtsA R286W at all tested concentration, indicated by higher autocorrelation decay times  $\tau$ . **f**, Scheme of TIRF experiment to measure the lifetime of a TAMRA labelled FtsZ C-terminal peptide. **g**, Representative histograms of the FtsZ CTP lifetime distribution in the presence of FtsA WT-His6 and FtsA R286W-His6.

**h**, Representative curves for QCM-D experiments. At 0.8  $\mu\text{M}$  the frequency change (=membrane binding) is identical between FtsA WT (green) and R286W (cyan). FtsA R286W can be washed easily from the membrane, whereas FtsA WT sticks stronger to the membrane, indicating stronger oligomerization. **i**, Scatter plots of FtsA wt (green, left) and FtsA R286W (cyan, right) intensities against FtsZ intensities from colocalization analysis for 0.2 and 0.4  $\mu\text{M}$ . The steepness of the slope is consistently high for FtsA R286W but decreases drastically for FtsA WT at 0.4  $\mu\text{M}$ .

511

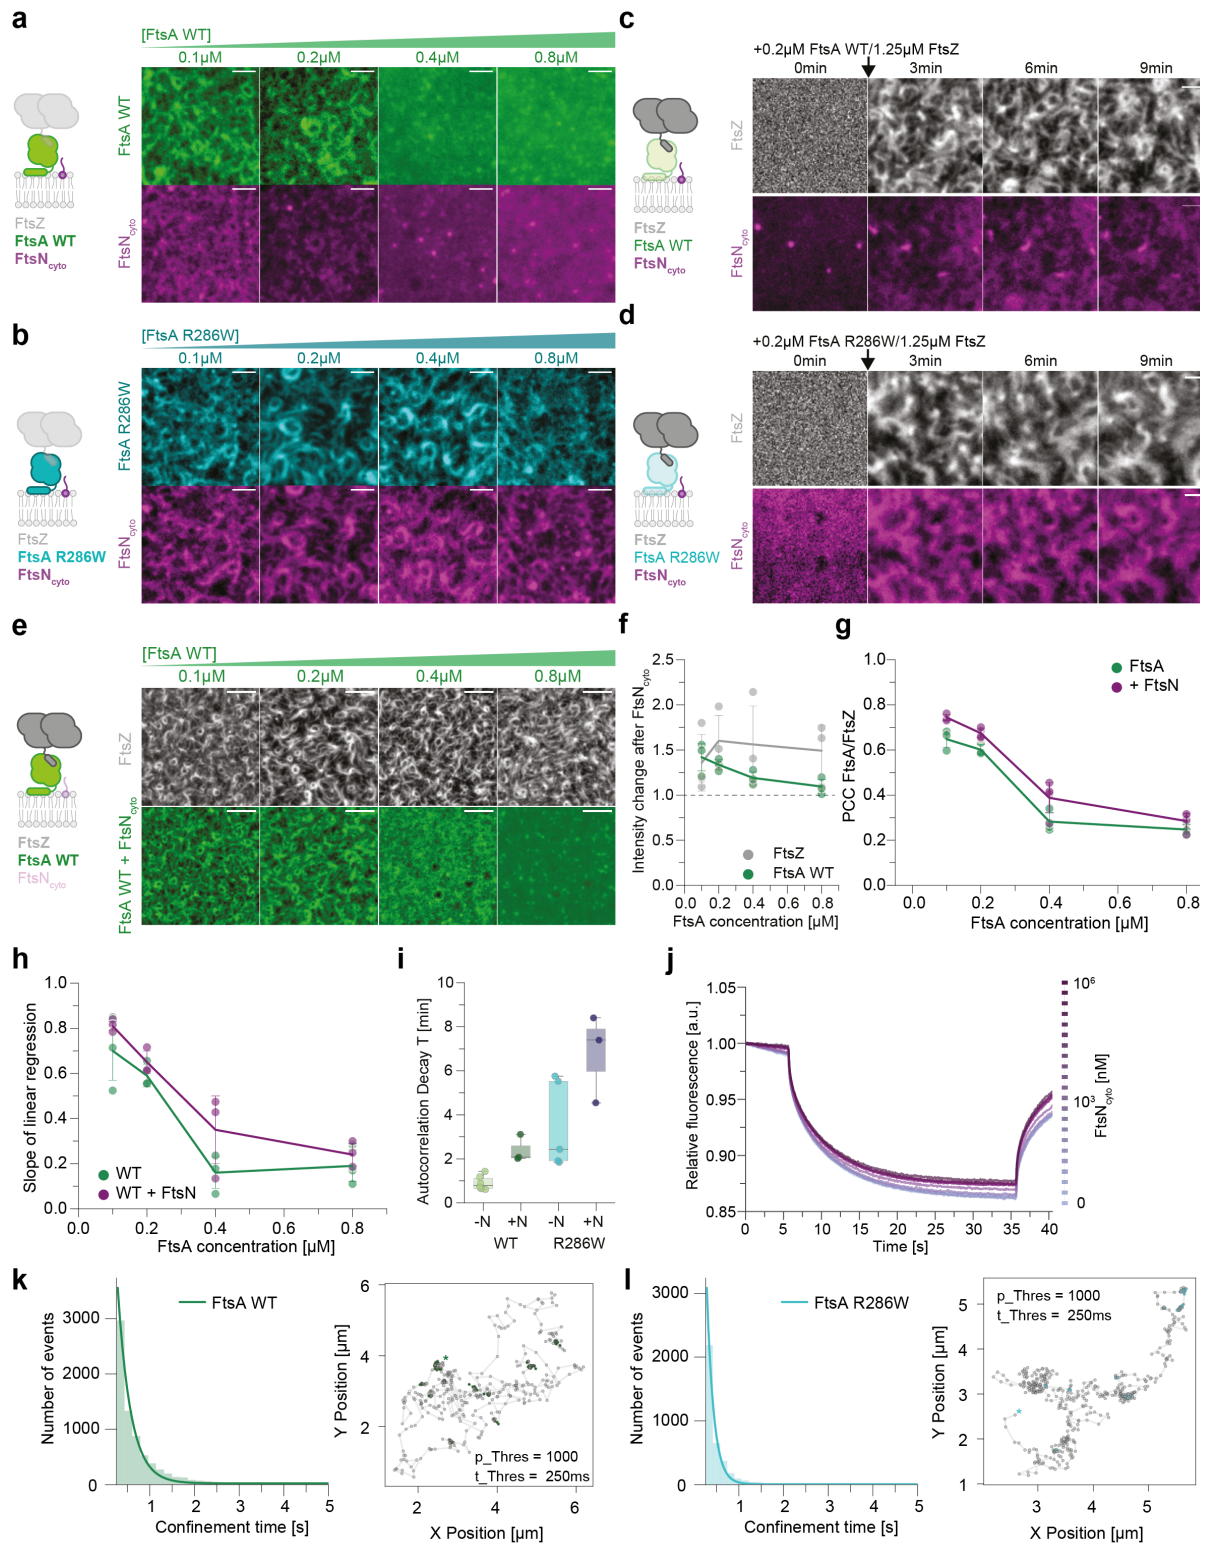

**Figure S2: FtsN<sub>cyto</sub> follows FtsA R286W co-filaments better than FtsA WT**

**a**, Representative micrographs of Cy3-FtsA WT (green) and Cy5-FtsN<sub>cyto</sub> (magenta) at increasing FtsA WT and constant FtsZ concentration and Tris-NTA-lipid ratio of 0.25%. FtsN<sub>cyto</sub> and FtsA form co-filaments at FtsA concentrations of up to 0.2  $\mu$ M, but fail to form a pattern at

higher concentrations. **b**, Representative micrographs of Cy3-FtsA R286W (cyan) and Cy5-FtsN<sub>cyto</sub> (magenta) at increasing FtsA R286W and constant FtsZ concentration. FtsN<sub>cyto</sub> and FtsA form filaments in all concentrations tested. **c**, From a homogeneous distribution, Cy5-FtsN<sub>cyto</sub> (magenta) colocalizes with FtsZ filaments on the membrane after the addition of A488-FtsZ (grey) and 0.2  $\mu$ M FtsA WT at 0 min. **d**, From a homogeneous distribution, Cy5-FtsN<sub>cyto</sub> (magenta) does not colocalize with FtsZ filaments on the membrane after the addition of A488-FtsZ (grey) and 0.2  $\mu$ M FtsA R286W at 0 min. Cartoons on the left side of **a-d** indicate the present and the labelled (bold) components. Scale bars are 2  $\mu$ m. **e**, Representative micrographs of Cy3-FtsA WT (green) and A488-FtsZ (grey) presence of FtsN<sub>cyto</sub>. Scale bars are 5  $\mu$ m. **f**, Presence of FtsN increases the amount of recruited FtsZ at all tested FtsA WT concentrations, whereas the amount of membrane bound FtsA remains constant above 0.2  $\mu$ M. **g**, Colocalization of FtsA/FtsZ quantified by PCC shows that colocalization is slightly increased in the presence of FtsN<sub>cyto</sub>, but the effect is not significant ( $0.28 \pm 0.04$ ;  $0.39 \pm 0.07$ ; p-value: 0.10; at 0.4  $\mu$ M). **h**, The slope of the linear regression indicates the [FtsZ] vs. [FtsA] ratio. In the presence of FtsN, the slope for FtsA WT increases slightly. **i**, FtsN<sub>cyto</sub> increases the persistency of the FtsZ pattern indicated by an increase in the autocorrelation decay time  $\tau$ . **j**, Representative MST traces for a titration of FtsN<sub>cyto</sub> to 50nM Cy5-FtsA WT. **k/l**, Histogram of FtsN<sub>cyto</sub> confinement times to co-filaments of FtsZ and FtsA WT (**k**) or FtsA R286W (**l**). Representative tracks containing FtsN<sub>cyto</sub> confinement events in the presence of FtsA WT (green) and R286W (cyan) are shown next to the histograms. The star indicates the beginning of the tracks. The insets indicate the chosen filters for the confinement analysis.

512

513

514

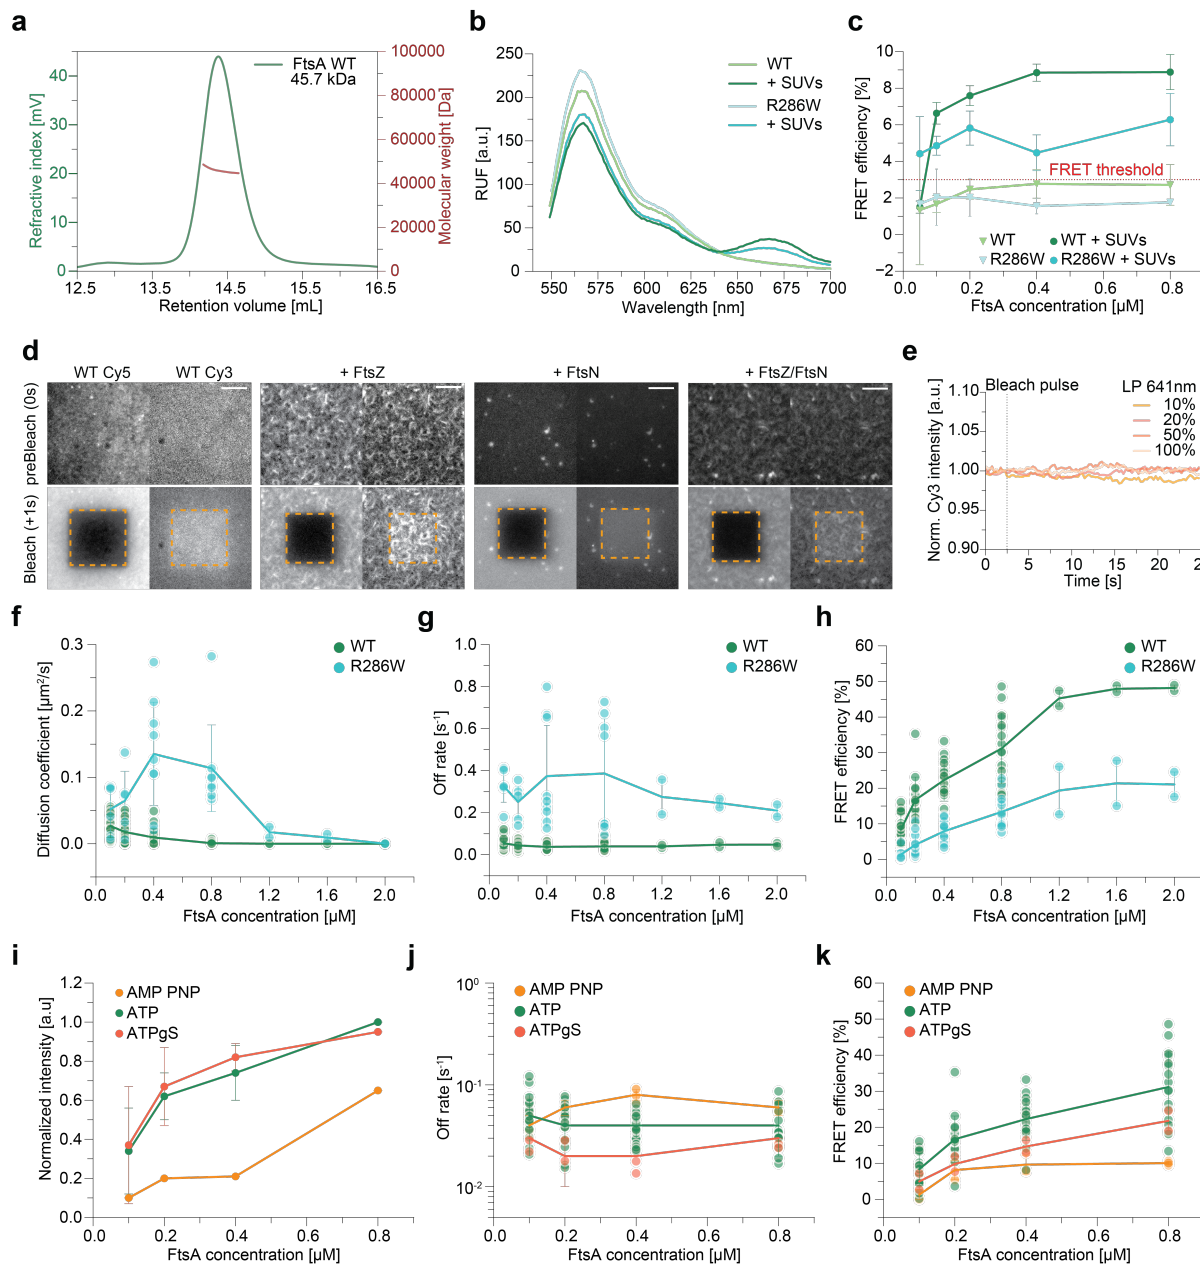

**Figure S3: FtsA WT self-interaction is membrane dependent, but does not require ATP hydrolysis**

**a**, SEC-MALLS experiments show that FtsA WT at 10  $\mu\text{M}$  is a monomer in solution. **b**, Cuvette-FRET measurements indicate that self-interaction of both, FtsA WT (green) and FtsA R286W (cyan), depends on the presence of membranes. **c**, FRET signal is below the significance threshold at all concentrations tested in absence of vesicles. In the presence of lipids FtsA WT exhibits stronger FRET. **d**, Representative micrographs for acceptor photobleaching experiments of FtsA WT alone (top left), WT + FtsZ (top right), WT + FtsN (bottom left) and WT + FtsZ/FtsN (bottom right). Scale bars are 5  $\mu\text{m}$ . **e**, The intensity of membrane-bound Cy3-FtsA WT is not affected by a Cy5-bleach pulse with increasing laser power (LP). **f**, Lateral diffusion



of FtsA R286W drops significantly to FtsA WT levels at concentrations above 0.8  $\mu$ M. The lateral mobility of R286W seems lower at low concentrations, as the fast off-binding rate dominates. Additionally, less protein is bound to the membrane as shown in QCM-D experiments, which impedes  $D_{\text{coeff}}$  analysis. **g**, The off-rate of FtsA R286W remains faster than for FtsA WT at all tested concentrations. **h**, FRET efficiency of FtsA R286W and FtsA WT saturates at concentrations above 0.8  $\mu$ M. **i**, Nucleotide hydrolysis is not important for membrane binding of FtsA WT, as the protein binds to SLBs comparable in the presence of ATP and ATP $\gamma$ S. However, membrane binding is decreased in the presence of AMP PNP, which binds FtsA with lower affinity. **j**, The off-rate of FtsA WT is similar in the presence of ATP or ATP $\gamma$ S. **k**, FRET efficiency of FtsA WT is similar in the presence of ATP or ATP $\gamma$ S.

515

516

517

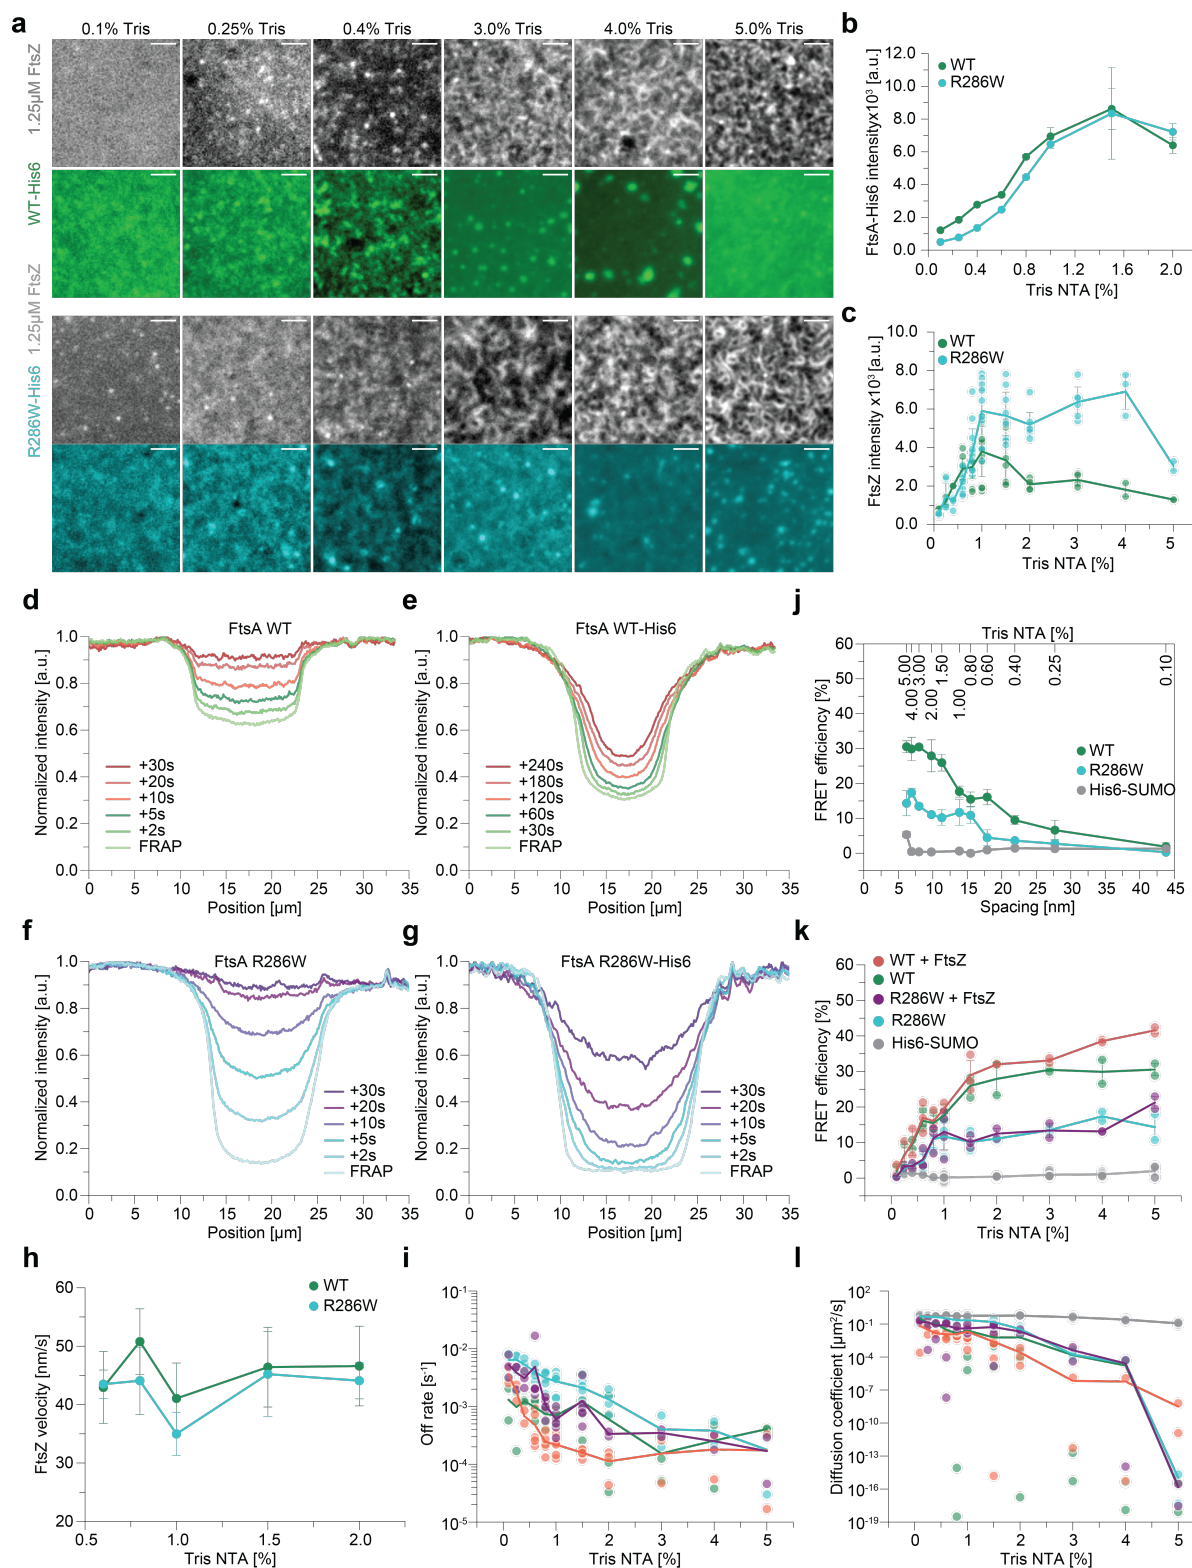

**Figure S4: FtsZ pattern forms more efficient with FtsA R286W-His, even at high densities.**

**a**, By using His-tagged proteins and membranes with Tris-NTA lipids allow to control the density of FtsA on the membrane as demonstrated by the intensities of His-tagged FtsAs at different Tris-NTA lipid densities. **b**, At Tris-NTA lipid densities higher than 1%, FtsA R286W-

His is able to recruit more FtsZ filaments than the FtsA-His. **c**, Representative micrographs of A488-FtsZ (grey) and Cy5-FtsA-His (green) or Cy5-FtsA R286W-His (cyan) at Tris-NTA lipid densities not shown in **Fig 4**. While the minimal protein density of FtsA needed to form an FtsZ pattern is similar, FtsZ filaments form a more disrupted cytoskeletal pattern at high densities of FtsA-His. **d-g**, Comparison of FRAP recovery profiles of native FtsAs (**d, f**) and His-tagged FtsAs (**e, g**). The recovery of the native proteins is dominated by exchange, while His-tagged proteins recovers dominantly by lateral diffusion, as can be seen by the different shapes of the recovery profiles. **h**, The treadmilling speed of FtsZ is similar at different densities of FtsA-His or FtsA R286W-His. **i**, As expected, off-rates of FtsA-His and FtsA R286W-His obtained from FRAP experiments are very low. **j**, FRET of His-tagged FtsAs decreasing with increasing spacing indicating self-interaction. The His6-SUMO control only exhibits weak FRET at the maximum density were different fluorophores can be closer to each other than the theoretical FRET limit (5 nM). **k**, FRET efficiency of His-tagged FtsAs  $\pm$  FtsZ and His6-SUMO on membranes with up to 5% Tris-NTA lipids. The FRET signal of FtsA-His is consistently higher compared to FtsA R286W-His. Adding FtsZ has a only a very modest effect on the self-interaction. **l**, Diffusion coefficient of His-tagged FtsAs  $\pm$  FtsZ and His6-SUMO on membranes with up to 5% Tris-NTA lipids. While mobility of His6-SUMO does not change, His-tagged FtsAs diffuses slower with increasing densities. Addition of FtsZ further decreases diffusion.

## 519 **Methods**

### 520 **Reagents**

521 All of the reagents, chemicals, peptides and software used are listed in the reagents table.

522

### 523 **Purification and fluorescence labelling of FtsZ**

524 FtsZ was purified as previously described<sup>4,21</sup>. In short FtsZ with a -terminal His<sub>6</sub>-SUMO fusion  
525 protein and seven residues (AEGCGEL) for maleimide coupling of thiol-reactive dyes was cloned  
526 into a pTB146-derived vector<sup>21</sup>. FtsZ was expressed in *E. coli* BL21 cells, at 37 °C in Terrific Broth  
527 supplemented with 100 µg ml<sup>-1</sup> ampicillin and expression was induced at an OD<sub>600</sub> of 0.6-0.8  
528 with 1 mM isopropyl-β-thiogalactopyranoside (IPTG) and incubated for 5 h at 37 °C. Cells were  
529 harvested by centrifugation (5,000*g* for 30 min at 4 °C). The pellet was resuspended in buffer A  
530 (50 mM Tris-HCl [pH 8.0], 500 mM KCl, 2 mM β-mercaptoethanol and 10% glycerol) plus 20 mM  
531 imidazole and supplemented with ethylenediaminetetraacetic acid (EDTA)-free protease  
532 inhibitor cocktail tablets (Roche Diagnostics). Cells were lysed using a cell disrupter (Constant  
533 Systems; Cell TS 1.1) at a pressure of 1.36 kbar and subsequently incubated with 2.5 mM MgCl<sub>2</sub>  
534 and 1 mg ml<sup>-1</sup> DNase for 15 min. Cell debris was removed by centrifugation at 60,000*g* for 30 min  
535 at 4 °C and the supernatant was incubated with nickel-nitrilotriacetic acid (Ni-NTA) resin (HisPur  
536 Ni-NTA Resin; Thermo Fisher Scientific) for 1 h at 4 °C. The resin was washed with buffer A  
537 containing 10 mM imidazole, followed by buffer A with 20 mM imidazole and the protein was  
538 subsequently eluted with buffer A supplemented with 250 mM imidazole. To cleave the His<sub>6</sub>-  
539 SUMO, FtsZ together with His-tagged SUMO protease (Ulp1) (1:100 molar ratio) was dialyzed  
540 overnight at 4 °C against buffer B (50 mM Tris-HCl [pH 8.0], 300 mM KCl and 10% glycerol). To  
541 remove remaining His-tagged molecules, the sample was again passed through Ni-NTA resin,  
542 equilibrated with buffer B. The polymerization-competent fraction of the purified FtsZ was  
543 enriched by CaCl<sub>2</sub> at room temperature after buffer exchange into polymerization in buffer C  
544 (50 mM PIPES [pH 6.7] and 10 mM MgCl<sub>2</sub>). Polymerization was induced with 10mM CaCl<sub>2</sub> and  
545 5mM GTP, incubated for 20 mins at RT and the polymeric fraction was collected by centrifugation  
546 at 15,000*g* for 2 min and the gel-like pellet was resuspended in buffer D (50 mM Tris-HCl [pH 7.4],  
547 50 mM KCl, 1 mM EDTA and 10% glycerol). For labelling, the thiol-reactive dye Alexa Fluor 488  
548 C5 Maleimide (Thermo Fisher Scientific) was dissolved in dimethyl sulfoxide (DMSO) following  
549 the manufacturer's instructions. FtsZ was reduced by incubating the protein with a 100× molar  
550 excess of tris(2-carboxyethyl)phosphine (TCEP) for 20 min at room temperature. A 10× molar  
551 excess of Alexa Fluor 488 was added and extensively dialyzed against buffer D overnight at 4 °C.  
552 Remaining CaCl<sub>2</sub>, GTP and free dye was removed via a PD10 desalting column and peak fraction  
553 were collected, flash frozen in liquid nitrogen and stored at -80 °C.

554

## 555 **Purification and fluorescence labelling of FtsAs**

556 FtsA was cloned into vector pMAR19, with an N-terminal TwinStrep-SUMO fusion protein plus a  
557 5xGlycine tag for fluorescence labelling via sortagging. FtsA was expressed in *E. coli* BL21 cells,  
558 grown at 37 °C in 2× YT medium supplemented with 100 µg ml<sup>-1</sup> ampicillin and expression was  
559 induced at an OD600 of 0.6-0.8 with 1 mM IPTG. The protein was expressed overnight at 18 °C  
560 and harvested by centrifugation (5,000*g* for 30 min at 4 °C. The pellet was resuspended in buffer  
561 A (50 mM Tris-HCl [pH 8.0], 500 mM KCl, 10 mM MgCl<sub>2</sub> and 0.5mM DTT) supplemented with  
562 EDTA-free protease inhibitor cocktail tablets and 1 mg ml<sup>-1</sup> DNase I. Cells were lysed by  
563 sonication using a Q700 Sonicator equipped with a probe of 12.7mm diameter, which was  
564 immersed into the resuspended pellet. The suspension was kept on ice during sonication  
565 (Amplitude 40, 1sec on, 5sec off for a total time of 10 minutes). Subsequently, cell debris was  
566 removed by centrifugation at 23,500*g* for 45 min at 4 °C. The clarified lysate was incubated with  
567 IBA Lifesciences Strep-Tactin® Sepharose® resin for 1h at 4 °C. Subsequently, the resin was  
568 washed with 40x CV buffer A and the fusion protein was eluted using buffer A containing 5 mM  
569 desthiobiotin. The protein concentration was determined with Bradford and adjusted to 12µM  
570 with buffer A, in order to avoid precipitation of the protein. The His6-SUMO protease Ulp1 was  
571 added in a 1:100 molar ratio and the TS-SUMO tag was cleaved overnight at 4°C, without shaking.  
572 To remove the cleaved tag and Ulp1, FtsA was subjected so Size Exclusion Chromatography. A  
573 HiLoad 26/600 Superdex 200 Prep grade column was equilibrated with buffer B (50mM Tris [pH  
574 8.0], 500mM KCl, 10mM MgCl<sub>2</sub>, 10% Glycerol and 0.5mM DTT) and the protein was injected. The  
575 peaks containing the final protein, corresponding to monomeric FtsA, were determined via SDS-  
576 page gel-electrophoresis, pooled and concentrated as described above. For total internal  
577 reflection fluorescence microscopy FtsA was labeled with Cyanin-3 or Cyanin-5 via sortagging<sup>40</sup>.  
578 The 5xGly tag at the N-terminus of FtsA was conjugated to CLEPTGG-peptide, which was  
579 previously labeled via maleimide directed labelling with either sulfo-Cyanine 3 or Cyanine 5-  
580 maleimide (Lumiprobe). 10µM Sortase, 0.5mM labeled peptide and 10µM of FtsA were mixed  
581 together and incubated overnight at 4°C. To remove free peptide, free dye and sortase, FtsA was  
582 subjected to another Size-exclusion on a HiLoad Superdex 200 16/600 prep grade column, pre-  
583 equilibrated with buffer B. The monomeric protein was collected and the concentration was  
584 determined via Bradford. The concentration of dye molecules (=labeled protein) was measured  
585 by NanoDrop and the Degree of Labelling (DoL) was determined by calculating the ratio of  
586 Labeled Protein:Protein. The DoL for FtsAs was between 65-70%. To obtain the hypermorphic  
587 mutant of FtsA, R286W, pMAR19 was used as a base for site-directed mutagenesis (SDM). We  
588 replaced Arginine 286 with Tryptophan, by exchanging a single nucleotide (C → T), resulting in  
589 pMAR25. The variant of FtsA was purified in the same way as described above for the wildtype

590 protein.

591 To purify His-tagged variants of FtsA wt and R286W, the C-terminal amphipathic helix at position  
592 405-420 (GSWIKRLNSWLRKEF\*) of pMAR19/pMAR25 was replaced by a 6xHistidine Tag,  
593 resulting in pNB4 and pNB5 (FtsA WT-His6 and R286W-His6 respectively). The purification and  
594 labeling were performed as described above for native FtsA wt.

595

### 596 **Purification and fluorescence labelling of His-tagged SUMO-Cys (HS-Cys)**

597 As a control for the FRET assay, we constructed a vector based on pTB146 containing only the  
598 SUMO protein, modified with a N-terminal 6xHis tag and a C-terminal Cysteine for maleimide  
599 labelling, resulting in pPR5. HS-Cys was expressed in *E. coli* BL21 cells, at 37 °C in Terrific Broth  
600 supplemented with 100 µg ml<sup>-1</sup> ampicillin and expression was induced at an OD600 of 0.6-0.8  
601 with 1 mM isopropyl-β-thiogalactopyranoside (IPTG) and incubated for 3 h at 37 °C. Cells were  
602 harvested by centrifugation (5,000g for 30 min at 4 °C). Lysis and incubation with Ni-NTA-beads  
603 was performed as described before for FtsZ. The protein was eluted with buffer A (50 mM Tris-  
604 HCl [pH 7.4], 300 mM KCl and 10% glycerol) supplemented with increasing concentrations of  
605 Imidazole (50/100/150/200/250/300/400mM). The purity of the fractions were checked by  
606 SDS Page and the eluted fractions with 200 and 250mM Imidazole were pooled together.  
607 Subsequently HS-Cys was dialyzed overnight against buffer B (50 mM Tris-HCl [pH 7.4], 100 mM  
608 KCl and 10% glycerol) to remove remaining Imidazole. HS-Cys was labelled by maleimide  
609 directed labelling with sulfo-Cyanine 3 and Cyanine-5 maleimide as described above for FtsZ.

610 To remove free dye and remaining traces of Imidazole, the protein was subjected to Size-  
611 exclusion on a HiLoad Superdex 200 16/600 prep grade column, pre-equilibrated with buffer B.  
612 The peaks, corresponding to the labelled HS-Cys were collected and concentrated with Vivaspin  
613 20 centrifugal concentrators (5kDa cutoff). The final concentration and the degree of labeling  
614 were determined as described above and the protein was stored at -80°.

615

### 616 **Labeling of peptides**

617 The cytoplasmic peptide of FtsN with a C-terminal His6 tag and an N-terminal cysteine residue  
618 was labelled and handled as described before<sup>4</sup>. The C-terminal peptide (CTP) of FtsZ conjugated  
619 to an N-terminal TAMRA dye (5-Carboxytetramethylrhodamine) (TAMRA-  
620 KEPDYLDIPAFLRKQAD) was purchased from Biomatik and reconstituted in buffer A (50mM  
621 HEPES-KOH, [pH 7.4] to a concentration of 2mg ml<sup>-1</sup>, flash frozen and stored at -80 °C.

622

### 623 **Quartz crystal microbalance-Dissipation (QCM-D)**

624 QCM-D experiments were performed with the QSense Analyzer from Biolin Scientific, equipped

625 with silica coated sensor (QX3 303). The sensors were cleaned for 10s in a Zepto plasma cleaner,  
626 mounted in the QCM-D chambers and the acquisition of the experiment was first performed in  
627 the reaction buffer (50mM Tris-HCl [pH 7.4], 150mM KCl and 5mM MgCl<sub>2</sub>. The supported lipid  
628 membrane was formed by rupturing 0.5mM small unilamellar vesicles (SUVs) in the presence of  
629 MgCl<sub>2</sub>. The lipid composition used was 67% DOPC : 33% DOPG. After bilayer formations, the  
630 reaction buffer supplemented with 2mM ATP, 2mM GTP and 1mM DTT was injected and the  
631 signal was recorded until a stable equilibrium was reached. Subsequently increasing  
632 concentrations of FtsA were injected in the QCM-D chamber and changes in frequency and  
633 dissipation were monitored in real-time. The flow rate used in all experiments was 25μL min<sup>-1</sup>  
634 and the temperature was set to 25 °C. To estimate the membrane binding affinity, we extracted  
635 the frequency changes for different FtsA concentrations and fitted a Hill equation  $y = S + (E -$   
636  $S) * (\frac{x^n}{k^n + x^n})$ , where S is the starting point, E the end point, n is the Hill coefficient and k the  
637 dissociation constant. The measured binding affinity is an upper estimate, because QCM-D  
638 accounts not only on the dry molecular mass, but also on hydrational shell of the molecular  
639 assembly.

640

#### 641 **Size exclusion chromatography with multiple angle light scattering (SEC-MALS)**

642 45μg (100μL of a 12μM solution) of purified FtsA WT was resolved on a Superdex 200 Increase  
643 10/300 at a flow rate of 0.5ml min<sup>-1</sup> at room temperature. Light scattering was recorded on a  
644 miniDawn light scattering device (Wyatt). Changes in the refractive index were used to define the  
645 peak area, which was used to obtain the molecular mass. The analysis of the data was performed  
646 with the ASTRA software (Wyatt).

647

#### 648 **Microscale thermophoresis (MST)**

649 MST experiments were performed with either 50 nM FtsA wt or R286W labeled with Cyanin-5  
650 and increasing concentrations of unlabeled FtsN<sub>cyto</sub>. The peptide was diluted in buffer A (50 mM  
651 Tris-HCl [pH 7.4], 150 mM KCl, 5 mM MgCl<sub>2</sub> and 0.005% Tween-20). After adding the peptide to  
652 the protein, the mixtures were left to incubate for 10 min at room temperature and subsequently  
653 loaded in premium coated capillary tubes (NanoTemper). Measurements were performed with a  
654 Monolith NT.115 (NanoTemper) equipped with a blue and a red filter set. The data was acquired  
655 with 20% MST and 20% light-emitting diode settings at 25°C. Cy5 fluorescence was measured for  
656 5s before applying a thermal gradient for 30 s. Binding curves were obtained by plotting the  
657 normalized change in fluorescence intensity after 20s against the concentration of titrated  
658 peptide. To extract the binding affinity, a Hill equation was fitted  $= U + \frac{B-U}{1+(\frac{EC50}{C})^n}$ , where C is the

659 peptide concentration, U is the signal for the unbound state, B the signal for the bound state and  
660 n is the Hill coefficient.

661

### 662 **Cuvette FRET experiments**

663 For in solution FRET experiments, increasing concentrations of Cy3-FtsA and Cy5-FtsA in a  
664 50%:50% ratio were mixed in 100 $\mu$ L reaction buffer (50mM Tris-HCl [pH7.4], 150mM KCl and  
665 5mM MgCl<sub>2</sub>) inside a quartz cuvette (Hellma® fluorescence cuvettes, ultra Micro). The spectrums  
666 were measured using a Spectrophotometer Spectramax M2e Plate- + Cuvette Reader. Cy3 labeled  
667 FtsA was excited at a wavelength of 520nm and the resulting emission spectrum was recorded  
668 from 550-700nm in 1nm steps. To avoid crosstalk of the excitation light, a cutoff filter was set to  
669 550nm. Addition of ATP or small unilamellar vesicles (SUVs) was measured individually for each  
670 concentration. Buffer controls, containing the corresponding reagents and only Cy5-FtsA were  
671 measured and used as background corrections for measurements Cy3-& Cy5-FtsA. Background  
672 corrected spectra were used to estimate FRET efficiency by  $E(\%) = \frac{F_a}{F_d+F_a} * 100$ , where  $F_a$  is  
673 the peak of acceptor (=Cy5) emission at 670nm and  $F_d$  the peak of the emission of the donor  
674 (=Cy3) spectrum at 565nm.

675

### 676 **Preparation of coverslips**

677 Glass coverslips were cleaned in piranha solution (30% H<sub>2</sub>O<sub>2</sub> mixed with concentrated H<sub>2</sub>SO<sub>4</sub> at  
678 a 1:3 ratio) for 60 min, and extensively washed with ddH<sub>2</sub>O, followed by 10min sonication in  
679 double-distilled H<sub>2</sub>O and further washing with ddH<sub>2</sub>O. Cleaned coverslips were stored for no  
680 longer than 1 week in H<sub>2</sub>O water. Before formation of the supported lipid bilayers, the coverslips  
681 were dried with compressed air and treated for 10 min using a Zepto plasma cleaner (Diener  
682 electronics) at full power. As reaction chambers, 0.5-ml Eppendorf tubes, without the conical end,  
683 were glued on the coverslips with ultraviolet glue (Norland Optical Adhesive 63) and exposed to  
684 ultraviolet light for 10 min.

685

### 686 **Preparation of small unilamellar vesicles (SUVs)**

687 For experiments without His tagged peptides, 1,2-dioleoyl-sn-glycero-3-phospho-(1'-rac-  
688 glycerol) (DOPC) and 1,2-dioleoyl-sn-glycero-3-phospho-(1'-rac-glycerol) (DOPG) at a ratio of  
689 67:33 mol% was used. To enable peptide attachment to the lipid membrane SUVs with 1 mol%  
690 dioctadecylamine (DODA)-tris-NTA (synthesized by ApexMolecular), in a ratio of 66:33:1 mol%  
691 DOPC:DOPG:Tris-NTA, were prepared. To titrate the density of Tris-NTA lipids, SUVs without and  
692 with up to 5% Tris-NTA were mixed together before supported lipid bilayer formation in the  
693 appropriate volumes. For SUV preparation, lipids in chloroform solution were added into a glass



694 vial and dried with filtered N<sub>2</sub> to obtain a thin homogeneous lipid film. Residual chloroform was  
695 removed by further drying the lipids for 2-3h under vacuum. Subsequently swelling buffer  
696 (50 mM Tris-HCl [pH 7.4] and 300 mM KCl) was added to the lipid film and incubated for 30 min  
697 at room temperature to obtain a total lipid concentration of 5 mM. When Tris-NTA lipids were  
698 present in the mix, 5mM Ni<sub>2</sub>SO<sub>4</sub> were added to the swelling buffer to load NTA groups with Nickel.  
699 To disrupt multilamellar vesicles, the mixture was repeatedly vortexed rigorously and freeze-  
700 thawed (8x) in dry ice or liquid N<sub>2</sub>. To obtain small unilamellar vesicles the liposome mixture was  
701 tip-sonicated using a Q700 Sonicator equipped with a 1/2mm tip (amplitude =1, 1s on, 4s off) for  
702 25 min on ice. The vesicles were centrifuged for 5 min at 10,000*g* and the supernatant was stored  
703 at 4 °C in an Argon atmosphere and used within 1 week.

704

### 705 **Preparation of supported lipid bilayers (SLBs)**

706 To prepare supported lipid bilayers, the SUV suspension was diluted to a lipid concentration of  
707 0.5 mM with swelling buffer. Vesicle rupture was induced by adding 5mM CaCl<sub>2</sub> to the SUVs on  
708 the glass surface. The bilayers were incubated for 30 minutes at 37°C, and remaining non-fused  
709 vesicles were washed away by pipetting an excess of swelling buffer (5x) on top, followed by 5x  
710 washes with reaction buffer (50 mM Tris-HCl [pH 7.4], 150 mM KCl and 5 mM MgCl<sub>2</sub>) The  
711 membranes were used within 4 hours after the preparation.

712

### 713 **TIRF microscopy**

714 Experiments were performed using two TIRF microscopes. The iMIC TILL Photonics was  
715 equipped with a 100× Olympus TIRF NA 1.49 differential interference contrast objective. The  
716 fluorophores were excited using laser lines at 488, 561 and 640 nm. The emitted fluorescence  
717 from the sample was filtered using an Andromeda quad-band bandpass filter (FF01-446-523-  
718 600-677). For the dual-colour experiments, an Andor TuCam beam splitter equipped with a  
719 spectral long pass of 580 and 640 nm and a band pass filter of 525/50, 560/25 and 710/80  
720 (Semrock) was used. Time series were recorded using iXon Ultra 897 EMCCD Andor cameras (X-  
721 8499 and X-8533) operating at a frequency of 5 Hz for standard acquisition and at 10 Hz for  
722 single-molecule tracking. The Visitron iLAS2 TIRF microscope was equipped with a 100xOlympus  
723 TIRF NA 1.46 oil objective. The fluorophores were excited using laser lines at 488, 561 and  
724 640 nm. The emitted fluorescence from the sample was filtered using a Laser Quad Band Filter  
725 (405/488/561/640 nm). For the dual-colour experiments, a Cairn TwinCam camera splitter  
726 equipped with a spectral long pass of 565 and 635 nm and band pass filters of 525/50, 595/50,  
727 630/75, 670/50 and 690/50 was used. Time series were recorded using Photometrics Evolve  
728 512 EMCCD (512 x 512 pixels, 16 x 16 μm<sup>2</sup>) operating at a frequency of 5 Hz for standard.

729

### 730 **Dual color FtsA-FtsZ experiments**

731 To study co-localization and co-treadmilling of FtsA with treadmilling FtsZ filaments on  
732 supported lipid bilayers, we used Cy5-FtsA wt or Cy5-R286W (0.1–0.8  $\mu\text{M}$ ) and FtsZ-A488  
733 (1.25  $\mu\text{M}$ ) in 100  $\mu\text{l}$  of reaction buffer. Additionally, the reaction chamber contained 4 mM ATP and  
734 4 mM GTP, as well as a scavenging system to minimize photobleaching effects: 30 mM d-glucose,  
735 0.050 mg ml<sup>-1</sup> Glucose Oxidase, 0.016 mg ml<sup>-1</sup> Catalase, 1-10 mM DTT and 1 mM Trolox. Prior  
736 addition of all components a corresponding buffer volume was removed from the chamber to  
737 obtain a total reaction volume of 100  $\mu\text{l}$ . The dynamic protein pattern was monitored by time-  
738 lapse TIRF microscopy at one frame per two seconds and 50-ms exposure time.

739

### 740 **FtsZ single molecule experiments**

741 Single molecule experiments were performed as described previously<sup>41</sup>. In short, individual FtsZ  
742 proteins were imaged at single molecule level by adding small amounts of Cy5-labelled FtsZ  
743 (200pM) to a chamber with 0.2/0.4  $\mu\text{M}$  FtsA wt/R286W and 1.25  $\mu\text{M}$  A488-FtsZ.

744

### 745 **Single molecule measurements of the C-terminal peptide of FtsZ (CTP)**

746 To measure residence times of the FtsZ-CTP, we added the TAMRA-labeled CTP peptide  
747 (TAMRA-KEPDYLDIPAFLRKQAD, synthesized by Biomatik) to membranes with 1% Tris-NTA  
748 lipids. Before addition of the peptide, 1  $\mu\text{M}$  of His-tagged variants of FtsA wt and R286W were  
749 added to the chambers, incubated for 20 minutes and washed 6x with reaction buffer.  
750 Subsequently, 1nM of FtsZ TAMRA-CTP was added to the chamber and single molecule time-  
751 lapses were acquired every 32 or 51 ms, with exposure times of 30 and 50 ms, respectively.

752

### 753 **Dual-color FtsN-FtsZ and FtsN-FtsA experiments**

754 To study the colocalization of Cy5-labeled FtsN<sub>cyto</sub>, we used membranes with 0.25% Tris-NTA  
755 lipids to ensure stable peptide immobilization. FtsN peptide at the concentration of 1  $\mu\text{M}$  was  
756 added to the chamber and left to incubate for 20 minutes to ensure homogeneous binding.  
757 Subsequently the chamber was washed 6x with reaction buffer, to remove bulk peptide. To  
758 visualize colocalization with either FtsZ or FtsA, either a mix of FtsA and FtsZ-A488 or Cy3-FtsA  
759 and FtsZ was added. The concentration of FtsZ was again kept constant at 1.25  $\mu\text{M}$ , whereas FtsA  
760 concentrations were titrated from 0.1-0.8  $\mu\text{M}$ . The time-lapse videos were recorded for 10  
761 minutes after the addition, with one frame per two seconds.

762

### 763 **Single molecule experiments for confinement of FtsN<sub>cyto</sub>**

764 To study the interaction of single molecules of Cy5-labeled FtsN<sub>cyto</sub>, we also used membranes with  
765 0.25% Tris-NTA lipids. This time 1 μM of unlabeled FtsN<sub>cyto</sub> supplemented with 50 pM of Cy5-  
766 labeled FtsN<sub>cyto</sub> were added to the chamber and incubated for 20 minutes, followed by 6x washes  
767 with reaction buffer. Subsequently, 0.2 μM of either FtsA WT or FtsA R286W and 1.25 μM FtsZ-  
768 A488 were added to the chamber and pattern formation was recorded for 10 minutes. Single  
769 molecule time-lapses were acquired every 32 or 51 ms, with exposure times of 30 and 50 ms,  
770 respectively.

771

### 772 **Single molecule experiments on FtsA WT and FtsA R286W**

773 To study the behaviour of single molecules of FtsA WT and FtsA R286W, 0.1 μM of the unlabeled  
774 protein supplemented with 35 pM Cy5 of the respective FtsA variant were added to the reaction  
775 chamber. After 5 minutes of incubation, single molecule time-lapses were acquired every 125,  
776 250, 500, and 1000 and 2000 ms, with an exposure time of 50 ms. Subsequently, the bulk  
777 concentration of FtsA was increased to 0.2/0.4/0.8 μM and single molecule time-lapses were  
778 repeated as described above.

779

### 780 **FRAP and FRET experiments on SLBs**

781 To measure the membrane residence time and self-interaction of FtsA WT and FtsA R286W,  
782 acceptor (Cy5) photobleaching experiments were performed. Equimolar concentrations of Cy3-  
783 and Cy5-labeled FtsA, supplemented with 20% unlabeled FtsA were used to study FRET and  
784 FRAP. Five pre-bleach frames were acquired, followed by acceptor photobleaching of a  
785 rectangular ROI with 40% 641 laser power and a dwell size of 1 μs/pixel, 75% overlapping lines.  
786 The recovery of the signal or the increase in donor intensity were measured with either 2 frames  
787 or 1 frame per second. The different acquisition rates were implemented, due to the accelerated  
788 recovery of R286W compared to wt. To measure effects of FtsZ, 1.25 μM of unlabeled FtsZ were  
789 added to the membrane and FRET/FRAP was measured again. To quantify effects of FtsN, SLBs  
790 with 0.25% Tris NTA-lipids were pre-equilibrated with FtsN<sub>cyto</sub> before additions of FtsAs.  
791 Subsequently, 1.25 μM FtsZ was added as well to quantify effects of the combined presence of  
792 FtsN and FtsZ.

793

### 794 **SLB experiments of His-tagged FtsAs**

795 To study colocalization of His-tagged variants of FtsA, 0.5-1 μM of Cy5 labeled His-tagged FtsAs  
796 were added to the chamber, incubated for 20 minutes and washed 6x with reaction buffer.  
797 Subsequently 1.25 μM A488-FtsZ was added to the chamber and pattern formation was recorded

798 for 20 minutes. To control the density of membrane bound FtsA, SUVs without and with Tris-NTA  
799 lipids were mixed to obtain the respective Tris-NTA concentrations. To perform FRET/FRAP  
800 experiments, equimolar concentrations of Cy3 & Cy5 labeled His-tagged FtsAs (total 0.5-1  $\mu$ M) or  
801 His-SUMO-Cys were added to a chamber and treated as above. To study effects of FtsZ, 1.25  $\mu$ M  
802 unlabeled FtsZ were added to the chamber and recorded for 20 minutes. FRAP experiments were  
803 performed as described before.

804

### 805 **Image processing and analysis**

806 For data analysis, the movies were imported to the FIJI software<sup>42</sup>. For data analysis, raw,  
807 unprocessed time-lapse videos were used. All micrographs in the manuscript were processed  
808 with the walking average plugin of ImageJ, averaging the signal of four consecutive frames, and  
809 contrast was optimized for best quality.

810

### 811 **Colocalization analysis**

812 Time-lapse videos were first intensity-corrected and contrast-enhanced to avoid bleaching  
813 effects and simplify subsequent analysis. To remove contributions of X-Y drift, the videos were  
814 processed with the Linear Stack Alignment with SIFT plugin. Proper alignment was checked with  
815 the 3TP align plugin (J. A. Parker; Beth Israel Deaconess Medical Center, Boston). Subsequently,  
816 regions of interest (ROIs) in the center of the stacks were chosen for colocalization analysis. The  
817 Pearson's correlation coefficient (PCC) was quantified with the Image CorrelationJ 1o plugin. To  
818 extract information about the relative ratio of FtsZ/FtsA molecules (slope of linear regression)  
819 we also used the Image CorrelationJ 1o plugin. As an output, the plugin provides a scatterplot of  
820 FtsZ vs. FtsA intensities, to which we fitted a linear slope  $y = k * x + d$ , where k is the slope and  
821 d the offset. The slope was used as an estimate for the ratio of FtsA molecules below FtsZ  
822 filaments<sup>43</sup>.

823

### 824 **FtsN recruitment rate quantification**

825 To estimate the rate of FtsN<sub>cyto</sub> recruitment towards FtsA/Z co-filaments, we measured the PCC  
826 after adding FtsA/Z to a membrane homogeneously covered with FtsN<sub>cyto</sub> and fitted a power law  
827 equation  $y = a * (1 - e^{-b*t}) + c$ , where a is the starting point, b is the rate and c is the offset, to  
828 the increasing PCC values after protein addition and extracted the recruitment rate.

829

### 830 **Treadmilling and temporal PCC analysis**

831 Treadmilling dynamics, were quantified using an automated image analysis protocol previously  
832 developed in our lab<sup>25</sup>. To visualize colocalization of the co-treadmilling FtsZ & FtsA filaments,

833 we used dual-color videos obtained at an acquisition rate of one frame per two seconds. The two  
834 channels were aligned using FIJI's 3TP align plugin. Both channels were then subjected to the  
835 image subtraction protocol and colocalization was measured as described above.

836

### 837 **FtsZ autocorrelation analysis**

838 To measure reorganization dynamics of FtsZ filaments, we used a temporal correlation analysis  
839 based on the Image CorrelationJ 1o plugin. We quantified the PCC between the first frame to  
840 subsequent frames with increasing time lag ( $\Delta t$ ). The decrease in the PCC was plotted against  $\Delta t$   
841 to obtain autocorrelation curves. Slower decay indicates more persistent structures. The rates of  
842 decay were extracted by fitting monoexponential decay to the autocorrelation curves

843  $y = a * e^{(-b*t)} + k$ , where  $a$  is the starting point,  $b$  is the decay rate and  $k$  is the final offset. The  
844 half time of the monoexponential decay was calculated via the decay rate.

845

### 846 **Transient Confinement Analysis of FtsN<sub>cyto</sub>**

847 Single molecule experiments with FtsN<sub>cyto</sub> were tracked using the TrackMate plugin from  
848 ImageJ<sup>44</sup>. Non-moving particles and short tracks (below 1s) were filtered out and the data  
849 exported as .xml files. To analyze transient confinement periods of FtsN<sub>cyto</sub> to FtsZ/FtsA co-  
850 filaments we used the packing coefficient ( $p$ ) to identify when diffusing FtsN<sub>cyto</sub> molecules switch  
851 between free diffusion and confined motion. The packing coefficient is defined as the length of  
852 the trajectory in a short time window and the surface area that it occupies. This gives an estimate  
853 of the degree of free movement that a molecule displays in a period independently of its global  
854 diffusivity. This approach is adapted from Renner et al and implemented here as an easy-to-use  
855 python script<sup>45</sup>. The packing coefficient is computed for each time point as:

$$856 \quad p = \sum_i^{i+n-1} \frac{(x_{i+1} - x_i)^2 + (y_{i+1} - y_i)^2}{S_i^2}$$

857 Where  $x_i, y_i$  are the coordinates at time  $i$ ,  $x_{i+1}, y_{i+1}$  are the coordinates at time  $i+1$ ,  $n$  is the length  
858 of the time window, and  $S_i$  is the surface area of the convex hull of the trajectory segment between  
859 time points  $i$  and  $i+n$ . Periods of confinement are identified by setting a threshold corresponding  
860 to a certain confinement area size, since  $p$  scales with the size of the confinement area. Then it is  
861 possible to calculate the frequency and duration of confinement periods and to localize them in  
862 space. Each position will have a characteristic  $p$ , considering the behaviour of the following  $n$   
863 positions. This approach overcomes the limitations of using MSD calculation, which overlooks  
864 transient confinement periods. Nevertheless, the Brownian diffusion trajectories can temporarily  
865 mimic confinement due to random fluctuations of the length of the displacements. However, the  
866 amplitudes and durations of these fluctuations are most of the time smaller and shorter than the

867 ones associated with real non-Brownian transient motion. Therefore, the use of a threshold value  
868 of  $p$  ( $P_{thresh}$ ) and a minimal duration above this threshold ( $t_{thresh}$ ) can suppress the detection of  
869 apparent non-random behaviours without excluding the detection of real confinement. These  
870 parameters depend on the acquisition frequency (which will affect the length of the time window)  
871 and the characteristic time of confinement. Too large windows will not detect properly the  
872 confinement period, while the statistical uncertainty increases in shorter windows. Thus, to  
873 accurately detect confinement periods, the window size should be adjusted accordingly to the  
874 acquisition rate. To detect periods of confinement, we set  $p_{thresh}$  to 1000, which corresponds to  
875 confinement areas of roughly  $<50\text{nm}$ , and a  $t_{thresh}$  of 0.25 seconds, which corresponds to 5 and 8  
876 frames when using 51msec and 32msec acquisition rates, respectively. The thresholds for  
877 confinement and time were chosen after manual inspection of tracks and corresponding  
878 confinement events. Finally, mean confinement times were extracted by fitting a  
879 monoexponential decay function to histograms of confinement times of individual experiments.  
880 To validate the performance of our code, we simulated single molecule tracks that switch  
881 between free diffusion and transient confinement periods using FluoSim<sup>46</sup>. To simulate  
882 appropriate tracks some parameters were kept constant for all tracks: 50 molecules/FOV; a  $D_{coeff}$   
883 out- and inside  $0.2\mu\text{m}^2/\text{s}$  and the crossing probability was set to 1. To test the performance of our  
884 code we varied binding rates from  $0.1\text{-}0.5\text{s}^{-1}$ , unbinding rates from  $0.5\text{-}3\text{s}^{-1}$  and the trapped  $D_{coeff}$   
885 from  $0.002\text{-}0.008\mu\text{m}^2/\text{s}$ . The values were chosen according to previously acquired and published  
886 data<sup>4</sup>. At low diffusion coefficient for trapped molecules ( $<0.005\mu\text{m}^2/\text{s}$ ) confinement periods  
887 were identified with a marginal error of  $\pm 0.04\text{s}$ , whereas the performance of the routine suffered  
888 slightly when increasing the diffusion coefficient of trapped molecules ( $> 0.008\mu\text{m}^2/\text{s}$ ), but still  
889 resulted in values close to the ground truth ( $\pm 0.1\text{s}$ ). We also used these simulated tracks to fine-  
890 tune the thresholds for FtsN confinement time analysis. The source code can be found in  
891 <https://github.com/paulocaldas/Transient-Confinement-Analysis>.

892

### 893 **Single-molecule analysis of FtsZ and FtsA**

894 Single molecules of FtsA or FtsZ were tracked using the TrackMate plugin from ImageJ<sup>44</sup>. To  
895 obtain the residence time of FtsZ and FtsA, we performed a residence time analysis as described  
896 before<sup>41</sup>. Shortly, single molecules were imaged at different acquisition rates (0.1-2s) and the  
897 lifetime of the molecules was extracted from each data set. To account for photobleaching effect,  
898 the obtained lifetimes were plotted against the acquisition rate. Then, we fitted a linear regression  
899 to this data and the photobleach corrected lifetime was calculated by taking the inverse of the  
900 slope of the linear regression. Furthermore, we extracted the diffusion coefficient of FtsA single  
901 molecules at increasing concentrations. For this we filtered the obtained data, by considering only  
902 trajectories which are present on the membrane for more than 0.4s. This low filter threshold was

903 necessary, due to the very short lifetime of FtsA R286W molecules at low concentrations.  
904 Subsequently the diffusion coefficient of FtsA molecules was estimated by fitting an MSD curve  
905 to each individual trajectory.

906

### 907 **Quantifying FRET, $D_{\text{coeff}}$ and $k_{\text{off}}$ from FRAP experiments**

908 To estimate the degree of self-interaction of FtsA WT and FtsA R286W, we used a photobleaching  
909 approach as outlined above. Bleaching the acceptor dye leads to an increase in the donor  
910 intensity, which can be used to quantify the Foerster Resonance energy transfer (FRET)<sup>47</sup>. FRET  
911 efficiency was quantified with  $E[\%] = \frac{I_{\text{post}}}{I_{\text{post}} + I_{\text{pre}}} \times 100$ , where  $I_{\text{post}}$  is the intensity of the acceptor  
912 (Cy3) after bleaching of the donor and  $I_{\text{pre}}$  is the acceptor intensity before bleaching the donor.  
913 While quantifying membrane binding dynamics of FtsA, we realized soon, that the recovery of  
914 FtsA was achieved by two different mechanisms: simple on- and off-binding to the membrane and  
915 lateral diffusion of the protein along the SLB. To extract the contribution of both processes, we  
916 adjusted a routine recently published by Gerganova *et al.*<sup>35</sup>. In short, the code provides the  
917 contribution of both modes of recovery by analyzing the shape of the fluorescence recovery  
918 profile. For simple on/off binding, the profile shape during recovery does not change (compare  
919 Fig. S4h left). Contribution of diffusion leads to a change of the slope of the outer borders of the  
920 bleached region (S4h right). Thus, by measuring the change of the slope of the border recovery,  
921 diffusion and simple on/off binding can be distinguished. To adjust the code to our needs, we  
922 created a wrapper around your fit function, which can be used directly on .tiff images with  
923 support for ImageJ ROIs. We added a bleach correction, choice of projection axis (x or y) and  
924 optional mirroring, if bleaching was not symmetric. The original code by David Rutkowski can be  
925 found in <https://github.com/davidmrutkowski/1DReflectingDiffusion>, whereas our adjusted  
926 version, termed “FRAPdiff”, can be found at <https://git.ist.ac.at/csommer/frapdiff>.

927

### 928 **Calculation of spacing**

929 To calculate the theoretical spacing of His-tagged FtsAs or the His SUMO control, we consulted a  
930 previous QCM-D study using Tris-NTA lipids and a His-tagged version of ZipA<sup>48</sup>. The spacing in  
931 nm<sup>2</sup> was calculated by  $y = \frac{2}{\sqrt{3}} * \frac{1}{6.022 * x * 0.001}$ , where x is the protein density in pMol cm<sup>-2</sup> which can  
932 be estimated from the Tris-NTA lipid density<sup>49</sup>.

933

### 934 **Statistics and reproducibility**

935 Statistical details of the experiments will be reported in the figure captions. For all box plots  
936 throughout this work, boxes indicate the 25–75th percentiles, whiskers show the outlier values,  
937 and the midline indicates the median value. Reported *P* values were calculated using a two-tailed

938 Student's *t*-test for parametric distributions. Sample sizes are at least 3 independent experiments.  
939 No statistical test was used to determine sample sizes. The biological replicate (*n*) is defined as  
940 the number of independent experiments in which a new protein pattern was assembled.  
941 Independent experiments in some cases were performed on the same cover slip, which could fit  
942 up to six reaction chambers. Unless otherwise stated in the figure captions, the graphs show  
943 means ± s.d., and the error bars were calculated and are shown based on the number of  
944 independent experiments, as indicated. The distribution was assumed to be normal for all  
945 biological replicates.  
946  
947



## 948 Supplemental References

- 949 40. Popp, M. W., Antos, J. M., Grotenbreg, G. M., Spooner, E. & Ploegh, H. L. Sortagging: A  
950 versatile method for protein labeling. *Nat. Chem. Biol.* (2007).  
951 doi:10.1038/nchembio.2007.31
- 952 41. Baranova, N. & Loose, M. *Single-molecule measurements to study polymerization dynamics*  
953 *of FtsZ-FtsA copolymers. Methods in Cell Biology* **137**, (Elsevier Ltd, 2017).
- 954 42. Schindelin, J. *et al.* Fiji: An open-source platform for biological-image analysis. *Nature*  
955 *Methods* (2012). doi:10.1038/nmeth.2019
- 956 43. Dunn, K. W., Kamocka, M. M. & McDonald, J. H. A practical guide to evaluating colocalization  
957 in biological microscopy. *Am. J. Physiol. - Cell Physiol.* **300**, 723–742 (2011).
- 958 44. Tinevez, J. Y. *et al.* TrackMate: An open and extensible platform for single-particle tracking.  
959 *Methods* **115**, 80–90 (2017).
- 960 45. Renner, M., Wang, L., Levi, S., Hennekinne, L. & Triller, A. A Simple and Powerful Analysis  
961 of Lateral Subdiffusion Using Single Particle Tracking. *Biophys. J.* **113**, 2452–2463 (2017).
- 962 46. Lagardère, M., Chamma, I., Bouilhol, E., Nikolski, M. & Thoumine, O. FluoSim: simulator of  
963 single molecule dynamics for fluorescence live-cell and super-resolution imaging of  
964 membrane proteins. *Sci. Rep.* **10**, 1–14 (2020).
- 965 47. Sorkin, A., McClure, M., Huang, F. & Carter, R. Interaction of EGF receptor and Grb2 in living  
966 cells visualized by fluorescence resonance energy transfer (FRET) microscopy. *Curr. Biol.*  
967 **10**, 1395–1398 (2000).
- 968 48. Sobrinos-Sanguino, M., Vélez, M., Richter, R. P. & Rivas, G. Reversible Membrane Tethering  
969 by ZipA Determines FtsZ Polymerization in Two and Three Dimensions. *Biochemistry* **58**,  
970 4003–4015 (2019).
- 971 49. Eisele, N. B., Frey, S., Piehler, J., Görlich, D. & Richter, R. P. Ultrathin nucleoporin  
972 phenylalanine-glycine repeat films and their interaction with nuclear transport receptors.  
973 *EMBO Rep.* **11**, 366–372 (2010).
- 974
